# Supplementary material for: The kindness COVID-19 toolkit: a mixed-methods evaluation of a programme designed by doctors in training for doctors in training
Source: PubMed Central journal article supplement — BMJ Open. 2022 Nov 22;12(11):e060575. doi: 10.1136/bmjopen-2021-060575 (PMC9684278; doi:10.1136/bmjopen-2021-060575), 2022-11-22
Supplement: bmjopen-2021-060575.draft_revisions.pdf [file bmjopen-2021-060575.draft_revisions.pdf]

# BMJ Open

BMJ Open is committed to open peer review. As part of this commitment we make the peer review history of every article we publish publicly available.

When an article is published we post the peer reviewers' comments and the authors' responses online. We also post the versions of the paper that were used during peer review. These are the versions that the peer review comments apply to.

The versions of the paper that follow are the versions that were submitted during the peer review process. They are not the versions of record or the final published versions. They should not be cited or distributed as the published version of this manuscript.

BMJ Open is an open access journal and the full, final, typeset and author-corrected version of record of the manuscript is available on our site with no access controls, subscription charges or pay-per-view fees (<http://bmjopen.bmj.com>).

If you have any questions on BMJ Open's open peer review process please email [info.bmjopen@bmj.com](mailto:info.bmjopen@bmj.com)

# BMJ Open

## The kindness COVID-19 toolkit: a mixed methods evaluation of a workshop designed by doctors in training for doctors in training.

|                               |                                                                                                                                                                                                                                                                                                                                                                                                                                                                                                                                                                                                                                                                                                               |
|-------------------------------|---------------------------------------------------------------------------------------------------------------------------------------------------------------------------------------------------------------------------------------------------------------------------------------------------------------------------------------------------------------------------------------------------------------------------------------------------------------------------------------------------------------------------------------------------------------------------------------------------------------------------------------------------------------------------------------------------------------|
| Journal:                      | <i>BMJ Open</i>                                                                                                                                                                                                                                                                                                                                                                                                                                                                                                                                                                                                                                                                                               |
| Manuscript ID                 | bmjopen-2021-060575                                                                                                                                                                                                                                                                                                                                                                                                                                                                                                                                                                                                                                                                                           |
| Article Type:                 | Original research                                                                                                                                                                                                                                                                                                                                                                                                                                                                                                                                                                                                                                                                                             |
| Date Submitted by the Author: | 04-Jan-2022                                                                                                                                                                                                                                                                                                                                                                                                                                                                                                                                                                                                                                                                                                   |
| Complete List of Authors:     | Ward, Madeleine; Monash University, Obstetrics & Gynaecology; Monash Health, Women's & Newborn<br>Crinall, Karen; Crinall Consulting<br>McDonald, Rebecca; Monash Health, Women's & Newborn; Monash University, Obstetrics & Gynaecology<br>Crinall, William; Crinall Consulting<br>Aridas, James; Monash Health, Women's & Newborn; Hudson Institute of Medical Research, The Ritchie Centre<br>Leung, Cheryl; Monash Health, Women's & Newborn<br>Quittner, Danielle; Monash Health, Women's & Newborn<br>Hodges, Ryan J; Monash Health, Women's & Newborn; Monash University, Obstetrics & Gynaecology<br>Rolnik, Daniel ; Monash Health, Women's & Newborn; Monash University, Obstetrics and Gynaecology |
| Keywords:                     | COVID-19, OBSTETRICS, QUALITATIVE RESEARCH                                                                                                                                                                                                                                                                                                                                                                                                                                                                                                                                                                                                                                                                    |
|                               |                                                                                                                                                                                                                                                                                                                                                                                                                                                                                                                                                                                                                                                                                                               |

SCHOLARONE™  
Manuscripts

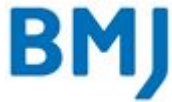

I, the Submitting Author has the right to grant and does grant on behalf of all authors of the Work (as defined in the below author licence), an exclusive licence and/or a non-exclusive licence for contributions from authors who are: i) UK Crown employees; ii) where BMJ has agreed a CC-BY licence shall apply, and/or iii) in accordance with the terms applicable for US Federal Government officers or employees acting as part of their official duties; on a worldwide, perpetual, irrevocable, royalty-free basis to BMJ Publishing Group Ltd ("BMJ") its licensees and where the relevant Journal is co-owned by BMJ to the co-owners of the Journal, to publish the Work in this journal and any other BMJ products and to exploit all rights, as set out in our [licence](#).

The Submitting Author accepts and understands that any supply made under these terms is made by BMJ to the Submitting Author unless you are acting as an employee on behalf of your employer or a postgraduate student of an affiliated institution which is paying any applicable article publishing charge ("APC") for Open Access articles. Where the Submitting Author wishes to make the Work available on an Open Access basis (and intends to pay the relevant APC), the terms of reuse of such Open Access shall be governed by a Creative Commons licence – details of these licences and which [Creative Commons](#) licence will apply to this Work are set out in our licence referred to above.

Other than as permitted in any relevant BMJ Author's Self Archiving Policies, I confirm this Work has not been accepted for publication elsewhere, is not being considered for publication elsewhere and does not duplicate material already published. I confirm all authors consent to publication of this Work and authorise the granting of this licence.

**Title:**

The kindness COVID-19 toolkit: a mixed methods evaluation of a workshop designed by doctors in training for doctors in training.

**Authors:**

Madeleine Ward<sup>1,2</sup> (0000-0001-6501-7151), Karen Crinall<sup>3</sup>, Rebecca McDonald<sup>1,2</sup>, William Crinall<sup>3</sup>, James Aridas<sup>1,4</sup>, Cheryl Leung<sup>1</sup>, Danielle Quittner<sup>1</sup>, Ryan J Hodges<sup>1,2</sup>, Daniel L Rolnik<sup>1,2</sup>

**Addresses:**

1. Department of Obstetrics and Gynaecology, Monash Health, Clayton, VIC, 3168, Australia
2. Monash University, Clayton, VIC, 3168, Australia
3. Crinall Consulting, VIC, Australia
4. The Ritchie Centre, Hudson Institute of Medical Research, Clayton, VIC, 3168, Australia

**Corresponding author:**

Madeleine C Ward  
Monash Health  
246 Clayton Road  
Clayton, 3168, Victoria, Australia  
madeleine.ward@trainee.ranzcog.edu.au

**Contribution statement:**

All listed authors have contributed to the manuscript and meet authorship criteria, without the exclusion of others.

**Conflict of interest statement:**

The authors have no competing interests to declare.

1  
2  
3  
4 **The kindness COVID-19 toolkit: a mixed methods evaluation of a workshop designed by**  
5 **doctors in training for doctors in training.**  
6  
7

8 Madeleine Ward<sup>1,2</sup>, Karen Crinall<sup>3</sup>, Rebecca McDonald<sup>1,2</sup>, William Crinall<sup>3</sup>, James Aridas<sup>1,4</sup>,  
9 Cheryl Leung<sup>5</sup>, Danielle Quittner<sup>6</sup>, Ryan J Hodges<sup>2,7</sup>, Daniel L Rolnik<sup>1,6</sup>  
10  
11  
12

- 13 1. Obstetrics and Gynaecology Registrar, Monash Health, Clayton, VIC, Australia
- 14 2. Monash University, Clayton, VIC, Australia
- 15 3. Consultant, Crinall Consulting, VIC, Australia
- 16 4. The Ritchie Centre, Hudson Institute of Medical Research, Clayton, VIC, Australia
- 17 5. Director of Training Obstetrics and Gynaecology, Monash Health, Clayton, VIC,  
18 Australia
- 19 6. Obstetrics and Gynaecology Consultant, Monash Health, Clayton, VIC, Australia
- 20 7. Program Director, Women's & Newborn, Monash Health, Clayton, VIC, Australia
- 21  
22  
23  
24  
25  
26  
27  
28  
29

30 **Corresponding author:** Dr Madeleine Ward

31 Monash University Wellington Road, Clayton, 3800, Victoria, Australia.

32 T: 03 9905 4000 E: madeleine.ward@monash.edu  
33  
34  
35  
36

37 **Contribution statement:** MW, RM, JA and DR contributed to the study design and  
38 implementation. Quantitative data was collected by JA, RM and MW, and analysed by DR,  
39 RM and MW. Qualitative data collection and analysis was conducted by KC and WC. MW  
40 oversaw the compilation of the first draft of the manuscript. All listed authors contributed to  
41 manuscript and meet authorship criteria, without the exclusion of others.  
42  
43  
44  
45

46 **Abstract**

47 **Objectives** The impact of a coronavirus disease (COVID-19) specific professional  
48 development program on the wellbeing of obstetrics and gynaecology (O&G) doctors in  
49 training (DiT) working during the pandemic.  
50  
51

52 **Design** A mixed-method evaluation of a single group pre-post test design study.  
53

54 **Setting** Melbourne, Australia between September 2020 and April 2021.  
55

56 **Participants** 55 O&G DiT working across four healthcare sites of a major tertiary hospital in  
57 Victoria, Australia, were included in the program.  
58  
59  
60

**Interventions** The delivery of a co-designed peer-to-peer (P2P) program, which identified and addressed the wellbeing goals of O&G DiT. Three interactive workshops were run alongside the implementation of a number of participant-led wellness initiatives.

**Main outcome measures** Repeated measures analysis of World Health Organization Wellbeing Index (WHO-5) and Copenhagen Burnout Inventory (CBI) scores across three time points during the program. Multilevel generalised linear mixed effects models with random intercept were fit to the data, both in the entire population (“intention-to-treat”) and restricted to those who attended the workshop (“per protocol” analysis). Participatory experiences and program learnings were captured using the Most Significant Change (MSC) technique, which included inductive thematic analysis.

**Results** We demonstrated an overall 31.9% improvement in wellbeing scores ( $p=0.006$ ). The MSC evaluation captured a shift in workplace culture as a result of the program, with improvement across the domains of connection, caring, communication, confidence and cooperation.

**Conclusions** We have successfully used a mixed-methods approach to contextualise a productive program to improve the wellbeing of COVID-19 frontline healthcare workers.

**Keywords** Mixed methods evaluation, coronavirus disease (COVID-19) pandemic, Zoom, wellbeing program, Pandemic Kindness Movement, doctors in training, obstetrics and gynaecology, junior medical officers, healthcare worker, most significant change technique.

### Article Summary

#### Strengths and limitation of this study

- We provide a co-designed and participant-led pandemic specific educational program which prioritises, problem solves and tracks the indicators of burnout in frontline healthcare workers
- Our program is evaluated using a mixed-methods analysis, enhancing the interpretation of outcomes and adding valuable information about the impact, acceptability and utility of our intervention
- We pilot a wellbeing workshop model and evaluation strategy with promising utility in future healthcare and non-health settings

### Introduction

The novel coronavirus disease (COVID-19) pandemic has had an unparalleled impact on the provision of healthcare, resulting in significant physical and emotional burden on those accessing and servicing the acute hospital setting.[1,2] It has created further pressure on an

1  
2  
3  
4 already vulnerable group of doctors with additional risks from exposure to an infectious  
5 disease, reduced resources and high workload.[1,3]  
6  
7

8  
9 Burnout is a recognised occupational hazard for healthcare workers and encompasses  
10 emotional exhaustion, withdrawal from patients and loss of job satisfaction.[4] Ensuring the  
11 health of workers is vital for the delivery of a high quality service, with healthy workers  
12 demonstrated to provide better customer relations, have more positive attitudes, and be more  
13 enthusiastic. [3,5] In comparison to other professionals, doctors are ten-times more likely to  
14 suffer from psychological distress, especially those under the age of thirty.[6,7] These findings  
15 are not isolated to the Australian medical workforce, with 69% of USA healthcare workers  
16 reporting workplace stress and 37% of UK doctors requiring additional care due to burnout [4].  
17 More than a decade ago a national report highlighted the significant distress of Australian  
18 doctors in training (DiT) with less than 30% satisfied with their career, over half (54%) losing  
19 compassion for patients and more than two thirds (69%) having burnout [8]. Obstetrics and  
20 Gynaecology (O&G) DiT work long hours and shift work, which are known to contribute to  
21 dissatisfaction and reduced wellbeing, as well as occupational stress, burnout and mental health  
22 issues.[3]  
23  
24  
25  
26  
27  
28  
29  
30  
31  
32  
33

34 Despite safety and quality healthcare indicators being drivers for accountability there is a  
35 failure to recognise the need to support the wellbeing of healthcare workers.[7] In recognition  
36 of the immediate risk to the wellbeing of the Women's Health DiT group and associated  
37 impacts on health service provision we aimed to provide an appropriately resourced, efficient  
38 and effective COVID-19 pandemic-specific professional development program focused on  
39 improving the wellbeing of O&G DiT. The program was co-designed by the O&G DiT group  
40 and delivered via a peer-to-peer (P2P) teaching model, and aimed to:  
41  
42  
43  
44  
45  
46

- 47 1. Assess the wellbeing and symptoms of burnout among the Monash Women's DiT in  
48 O&G.
- 49 2. Provide immediate and practical tools and strategies to enhance the wellbeing of  
50 Monash Women's DiT working during the COVID-19 pandemic.
- 51 3. Generate an evidence base, informed by qualitative and quantitative data, to advise  
52 future implementation.  
53  
54  
55  
56  
57  
58  
59  
60

1  
2  
3  
4 Monash Women's, a major tertiary hospital in Victoria, Australia has been a leader in the  
5 implementation of COVID-19 strategic management plans, policies and procedures with the  
6 safety and wellbeing of staff, patients and the community at the forefront.[9]  
7  
8  
9

## 10 **Methods**

11 Here we list the steps involved in the P2P pilot program development, including the details of  
12 the co-design processes followed. The integration of a mixed-method analysis is explored, an  
13 approach which takes advantage of the considerable impact qualitative research methods can  
14 have on reviewing health interventions.[10] A quantitative evaluation was conducted of the  
15 World Health Organization Wellbeing Index (WHO-5) and Copenhagen Burnout Inventory  
16 (CBI) measures that were administered prior to and at multiple time points following the  
17 program.[11,12] Qualitative analysis utilising the Most Significant Change (MSC) technique,  
18 is also described and the key outcomes listed.  
19  
20  
21  
22  
23  
24  
25  
26

### 27 ***Research ethics approval***

28 The project was funded by the Monash Health Foundation and granted ethics approval from  
29 Monash Health Human Research Ethics Committee (QA/68545/MonH-2020-230841(v2)).  
30 Within the manuscript all details of the study are accurately and transparently provided in an  
31 honest account of the study.  
32  
33  
34  
35  
36

### 37 ***Participants***

38 All 55 Monash Women's doctors in training (DiT) working across four sites – one tertiary  
39 and three secondary hospitals (Monash Medical Centre, Dandenong District Hospital,  
40 Moorabbin Health and Casey Hospital) were invited to participate in the study. Our study  
41 was a pilot project with a convenience sample size without a formal power calculation.  
42 Recruitment was maximised via advertising utilising group email. An introduction and  
43 orientation session was held with opportunity to complete recruitment at this time, and  
44 reminder emails were sent to increase uptake. Recruitment at the beginning of the first  
45 workshop also took place. Inclusion criteria included being a current O&G DiT who were  
46 both available and willing to attend the workshops and complete the questionnaires.  
47  
48  
49  
50  
51  
52  
53  
54

### 55 ***Patient and public involvement***

56 The '*Monash Women's leading kindness COVID-19 toolkit*' program was developed using a  
57 co-design process. Three online workshops, each of three-hours duration, were delivered by  
58  
59  
60



1  
2  
3  
4 DiT to their peers during protected teaching time on 17 September 2020, 24 September 2020  
5 and 5 November 2020. This model was selected to maximise positive impacts and enable rapid  
6 implementation of change.[13] It is also a familiar style of learning given its similarity to the  
7 traditional 'journal club' style of medical education frequently used in the training of Australian  
8 medical doctors.  
9  
10  
11

### 12 13 ***The intervention***

14  
15 Workshop topics were modelled on the 'Pyramid of needs', for health worker wellbeing  
16 (Figure 1), (based on Maslow's hierarchy of needs),[14] and covered six topic areas: basic  
17 needs, safety, love and belonging, esteem, contribution and leadership. Workshop content  
18 dissemination was maximised with recordings, webmail links and online communities. In  
19 keeping with the co-design approach, participant-led initiatives were encouraged and  
20 developed during the workshop program, and supported advocating for personal solutions.  
21  
22  
23  
24  
25  
26

### 27 ***Figure 1 Pyramid of Needs***

28  
29  
30 An overarching self-selected group of senior DiT, known as workshop 'champions', initiated  
31 the project, formulated goals (Figure 2) and directed activities in line with those promoted by  
32 Beyond Blue 'Protecting your mental health and wellbeing as a healthcare worker'.[15]  
33 Monash Women's executive leaders were also engaged to participate and act on organisational  
34 level solutions. Together these contributed to a toolkit being developed which incorporated  
35 workshops, goals, activities and resources. Activities included the provision of a drink  
36 'hydration' station to encourage breaks; the creation and display of posters articulating the  
37 main workshop points; improvements to the doctor office space; social online sessions by  
38 Zoom Cloud Meetings (Zoom Video Communications, San Jose, CA, USA); and a team social  
39 media app. Further information on the program, including a workbook and templates can be  
40 found in resources: 'Monash Women's Leading Kindness COVID-19 Toolkit Pilot Project  
41 Most Significant Change Evaluation Report';[16] 'Monash Women's Leading Kindness  
42 COVID-19 Toolkit Pilot Project Quantitative Evaluation Report', [17] and 'Start up: A  
43 Kindness COVID-19 Toolkit'.[18]  
44  
45  
46  
47  
48  
49  
50  
51  
52  
53  
54

### 55 ***Figure 2 Goals of the 'Monash Women's leading kindness COVID-19 toolkit'***

### 56 57 58 ***The evaluation strategy***

### *Quantitative analysis*

The CBI [12] and WHO-5 [14] questionnaires, both well-validated and standardised, were employed to evaluate the pre-existing wellbeing and symptoms of burnout in the cohort O&G DiT (September 2020, timepoint one). Both were repeated at timepoint two (November 2020) and at timepoint three, six months following the completion of the workshop (April 2021). Questionnaires were delivered and secured electronically via the online data collection tool, Qualtrics (Qualtrics, Provo, UT, USA), with surveys labelled with an anonymous but memorable code, created by the participant, to preserve confidentiality.

The WHO-5 is a standardised questionnaire, which asks five questions focused on wellbeing in the preceding two-week time period (Appendix 1). A total score of less than 50 is considered to represent reduced wellbeing.[11] The CBI assesses the load of personal, work and patient related factors on burnout, with its benefits being a readily available and brief evaluation tool. A score of 25-50 indicates an intermediate level of burnout, and greater than 50 a high level of burnout.[19]

Statistical analyses were performed in Stata 16.1.(StataCorp. 2019. Stata Statistical Software: Release 16. College Station, TX: StataCorp LLC). To compare the CBI and WHO-5 scores after exposure to the program (timepoints two and three) with those before its implementation (timepoint one) accounting for the repeated measures design, multilevel generalised linear mixed effects models with random intercept were fit to the data, both in the entire population (“intention-to-treat”) and restricted to those who attended the workshops (“per protocol” analysis). In these models, the measurements timepoints were treated as fixed effects and participants were treated as random effects. The assumptions of linear additivity and homogeneity of the residuals were assessed by inspection of residual versus fitted plots. Effect estimates are reported as the mean difference with 95% confidence intervals, and p-values below 0.05 were considered statistically significant.

### *Qualitative analysis*

Qualitative evaluation utilising the MSC technique was chosen to gain insight into participants’ experience of the personal and professional impacts of the toolkit. Story gathering interviews took place via Zoom sessions between 8 December 2020 and 4 January 2021. Nine stories of change were collected from interviews that lasted between 20 and 40 minutes. To ensure rigour and impartiality external expertise in qualitative analysis was engaged. MSC was chosen

1  
2  
3  
4 because it seeks to learn about participants' perceptions of program impacts by evaluating their  
5 stories of significant change, and thereby complemented the program's participatory  
6 principles: co-design, peer leadership and P2P learning. MSC was also selected because of its  
7 focus on 'what works well and how to do more of what works'. [20]  
8  
9

10  
11  
12 Consistent with the MSC technique, the evaluation incorporated three main steps:

- 13 1. Collection of Significant Change stories.
  - 14 2. Selection of the Most Significant Change story, and identification of key themes.
  - 15 3. Documenting and communicating the Most Significant Change story and key themes.
- 16  
17  
18  
19

20 The MSC technique involves a hierarchical selection process which narrows the data down to  
21 one story representing the most significant change. A stakeholder panel consisting of trainees  
22 and supervisors, as well as interview participants who were contributors of stories of change,  
23 undertook a two-tiered process involving the selection of one significant story from a total of  
24 nine stories (Figure 3).  
25  
26  
27  
28  
29

30 *Figure 3 MSC selection process*  
31  
32

33 To gain a comprehensive picture of the range of significant changes experienced by participants  
34 an inductive analysis of all nine stories was conducted to capture emergent themes. This  
35 methodology is further discussed in other publications. [16,21,22]  
36  
37  
38

## 39 **Results**

### 40 *Participants*

41 Forty-six (83.6%) DiT completed the initial WHO-5 and CBI at timepoint one. Seventeen  
42 DiTs, including residents and registrars, attended at least one of the three live workshops. All  
43 55 DiT were exposed to the initiatives of the toolkit, however specific details of their uptake  
44 are unknown. Following the completion of the workshops (timepoint two), 27 responses were  
45 collected, of whom 59.3% (n=16) were workshop participants (live or recorded viewing). At  
46 timepoint three 11 responses were collected, with 63.6% (n=7) being participants of the  
47 workshops.  
48  
49  
50  
51  
52  
53  
54  
55

### 56 *Quantitative analysis: CBI and WHO-5*

57  
58  
59  
60

1  
2  
3  
4 *Figure 4 Repeated measures CBI and WHO-5 scores for all and restricted to those who*  
5 *participated in the ‘Monash Women’s leading kindness COVID-19 toolkit’ workshops.*  
6  
7

### 8 *Copenhagen Burnout Inventory*

9  
10 Among all DiT (those who participated in the workshop and those who did not), there was a  
11 mean reduction of 2.0 points (95% CI: -7.4 to 3.3) at timepoint two compared to timepoint one,  
12 although this reduction was not statistically significant ( $p = 0.454$ ). There was a mean reduction  
13 of 6.8 points (95% CI: -14.4 to 0.7) at timepoint three compared to timepoint one,  
14 demonstrating a trend towards statistical significance ( $p = 0.077$ ). Similarly, among those who  
15 participated in the workshop, there was a mean reduction of 0.3 points (95% CI: -6.8 to 6.2) at  
16 timepoint two compared to timepoint one, although this reduction was not statistically  
17 significant ( $p = 0.935$ ). There was a trend towards statistical significance ( $p = 0.086$ ) at  
18 timepoint three compared to timepoint one with a mean reduction of 8.2 points (95% CI range:  
19 -17.5 to 6.2).  
20  
21  
22  
23  
24  
25  
26  
27

### 28 *WHO wellbeing index*

29  
30 Among all participants there was a statistically significant mean increase of 10.5 points (95%  
31 CI: 3.3-17.7,  $p=0.006$ ) at timepoint two compared to timepoint one, and a statistically  
32 significant mean increase of 14.9 points (95% CI range: 0.5-29.3,  $p=0.006$ ) at timepoint three  
33 compared to timepoint one. Analysis restricted to those who participated in the workshop  
34 showed a mean increase of 9.2 points that trended towards statistical significance (95% CI: -  
35 0.2 to 18.5,  $p = 0.054$ ) at timepoint two compared to timepoint one, and a significantly higher  
36 WHO score at timepoint three, with a mean increase of 16.4 points (95% CI range: 3.2 to 29.7,  
37  $p = 0.015$ ) at timepoint three compared to timepoint one.  
38  
39  
40  
41  
42  
43  
44

### 45 *Qualitative Analysis*

#### 46 *The MSC story*

47  
48 The selected story ‘Team cohesiveness’ was contributed by a junior O&G DiT workshop  
49 participant. It was chosen by the panel because it described how the COVID-19 toolkit pilot  
50 brought about cultural change and fostered a sense of kinship by enabling basic needs to be  
51 met, breaking down hierarchical barriers within the Monash Women’s Health team and  
52 building team cohesiveness multi-directionally.  
53  
54  
55  
56  
57  
58  
59  
60

1  
2  
3  
4 *“With the introduction of the Wellbeing program there was a more organised*  
5 *sense of looking out for each other... A highlight was senior clinicians telling*  
6 *their own stories... Witnessing their fears and concerns, and their approaches to*  
7 *challenges makes you more impressed by their achievement, you feel like*  
8 *challenges are more approachable, the steps ahead are more attainable...The*  
9 *program was also an opportunity to address the things that make a cohesive team,*  
10 *that make us all better together.”*  
11  
12  
13  
14  
15  
16

### 17 *Themes*

18 Significant changes linked to five interconnected themes (Figure 5) were woven throughout  
19 the nine stories and encapsulated in the most significant change story selected by the panel.  
20  
21  
22

23  
24 Connection: Communication played an important role in fortifying connections.

25 *‘Hearing others talk about their experiences and feelings of not being okay and*  
26 *sharing my experiences and feelings. That made me feel more connected and*  
27 *less alone’.*  
28  
29  
30

31  
32 Caring: The workshop on meeting basic needs not only changed the way trainees thought about  
33 self-care and meeting their own basic needs, they also began to care more for each other.

34 *‘After the workshop people were asking, “Have you had water this morning?*  
35 *Have you had enough to eat?”*  
36  
37  
38  
39

40  
41 Communication: One story described the pilot program as having created a ‘space to talk’  
42 which allowed trainee doctors to ‘hear each other’.  
43  
44

45  
46 Confidence: DiT were more confident about their capacity to be leaders and to make a  
47 difference in their workplace.  
48

49 *‘The most important change brought about by the wellbeing program for me was*  
50 *recognising my agency. I learned there were changes I could make.’*  
51  
52  
53

54 Cooperation: Participants observed the shift to more cooperative work practices.

55 *‘More than before the whole team stepped up to help each other make it through*  
56 *the day together’.*  
57  
58  
59  
60

1  
2  
3  
4  
5 *Figure 5 Themes revealed by stories which came together to shift the workplace culture.*  
6  
7

## 8 **Discussion**

9  
10 *'The difference that made a difference.'* [22]  
11  
12

13  
14 This study piloted a pandemic educational program to improve wellbeing designed by and for  
15 a group of 55 O&G DiT at a major tertiary hospital in Victoria, Australia during the 2020  
16 COVID-19 pandemic. We tracked the indicators of wellbeing and burnout with collection of  
17 surveys before (n=46 and after (n=27 and 11) the implementation of three workshops, which  
18 were one component of a collection of initiatives that comprised a toolkit of resources. Nine  
19 workshop participants were interviewed about their most significant experiences of change  
20 resulting from the program. We demonstrated an overall 31.9% improvement in wellbeing  
21 scores. The MSC evaluation identified an overall positive shift in workplace culture associated  
22 with change across five domains: connection, caring, communication, confidence and  
23 cooperation.  
24  
25  
26  
27  
28  
29

30  
31  
32 The impact of COVID-19 on the safety and wellbeing of healthcare workers is well  
33 documented.[2,23-5] Ellis et al.[2] reported an increase in surgical error due to the combined  
34 effects of COVID-19 on doctors' sleep hygiene, concerns regarding infection exposure and the  
35 burden of personal protective equipment restricting movement and communication. However,  
36 despite well-known risks to DiT and an urgent call for interventions,[6,26] there has been a  
37 lack of validated programs aimed at improving their wellbeing.[7,27]  
38  
39  
40  
41  
42

43  
44 During the third month of the second Victorian COVID-19 pandemic lockdown, which lasted  
45 112 days from the 6<sup>th</sup> of July 2020 to the 26<sup>th</sup> of October 2020,[28] we observed that Monash  
46 Women's DiT were experiencing significantly reduced wellbeing (mean score 46.7) and  
47 intermediate levels of burnout (mean score 48.1). DiT working in O&G are responsible for  
48 providing care across a range of clinical areas within the health service site, including the  
49 emergency department, outpatient clinics, inpatient wards, operating theatres, and birthing  
50 suites. In a recent survey obstetricians and gynaecologists were amongst the highest at risk of  
51 physician burnout.[29] Anticipating that the added workload generated by a pandemic situation  
52 would pose additional risk to the wellbeing of O&G DiT is not unwarranted, with Ochsmann  
53 et al.[30] identifying strain levels as directly related to overtime worked. The provision of safe  
54  
55  
56  
57  
58  
59  
60

1  
2  
3  
4 care also depends on effective communication with patients, their families and across  
5 multidisciplinary teams spanning all levels of the organisational structure. These multi-  
6 dimensional care and communication challenges have also been demonstrated to increase risk  
7 for emotional and physical fatigue. [31]  
8  
9

10  
11  
12 The 'Monash Women's COVID-19 leading kindness toolkit' program demonstrated a 31.9%  
13 improvement in the wellbeing index for all DiT participants, and safeguarded against  
14 worsening burnout symptoms. Those who attended a component of the integrated workshops  
15 experienced slightly greater impact (35.5%) on wellbeing over time. The overall achievement  
16 of the pilot project, as expressed by participants in their stories of change, was a shift to a more  
17 caring and supportive workplace culture. Junior and senior DiT felt more connected as  
18 colleagues and were more confident about advocating for change and communicating with one  
19 another about their work. The impact of workplace friendships has been shown to be inversely  
20 related to workplace stress with healthcare workers relying most heavily on strong peer-  
21 support, sharing with senior staff and supportive social networks when facing a crisis.[3] The  
22 P2P style of our program was highlighted as a strength by participants. This is consistent with  
23 the finding of Chanchlani et al.[6] who evaluated a P2P mentoring program and demonstrated  
24 an improved sense of community and support. Similarly, Walton et al.[9] identified the  
25 important role of P2P interactions in the acquisition of complex non-technical skills.  
26  
27  
28  
29  
30  
31  
32  
33  
34  
35  
36

37 Based on our experience in this initiative, we strongly advocate for a mixed-methods approach  
38 in the evaluation of health care programs. Triangulating qualitative and quantitative methods  
39 enhances interpretation of outcomes, and provides valuable information about the impact,  
40 acceptability and utility of interventions.[12,31] This integrative approach utilises the  
41 complementary capacities of quantitative research in defining measurable variables and  
42 qualitative research in investigating complex social constructs.[12] Exploring reasons for  
43 participant satisfaction or dissatisfaction, lack of adherence and causes of conflicting outcomes  
44 in different population groups are examples of the way qualitative analysis can enhance  
45 quantitative findings.[32] Despite growing recognition of the value of mixed-method designs  
46 there remains a lack of published medical studies employing a dual-analysis approach.[12]  
47 Supported by Lewin et al.[31] who conducted a review of the Cochrane register and identified  
48 just one third undertook a combined quantitative and qualitative analysis. Recognised barriers  
49 to mixed-method designs in medical research include the need for adequate resourcing, the  
50  
51  
52  
53  
54  
55  
56  
57  
58  
59  
60

1  
2  
3  
4 time-consuming nature of the research process and difficulty accessing appropriately  
5 experienced qualitative researchers.[31]  
6  
7

## 8 **Implications and limitations** 9

10  
11  
12 The program was enthusiastically welcomed, and our findings attest to the benefits received by  
13 participants. The triangulation of quantitative and qualitative results demonstrates DiT were  
14 provided with tools to reduce burnout and improve wellbeing. Although our results suggest an  
15 improvement in burnout over time, this effect did not reach significance. Given the small  
16 numbers, our study may have been underpowered to detect a significant improvement in  
17 burnout. Alternatively, the program may have limited impact on improving burnout. However,  
18 given the entire cohort remained within the intermediate burnout category (score 25-50), our  
19 findings support the program's success in protecting against worsening burnout during the  
20 pandemic.  
21  
22  
23  
24  
25  
26  
27

28  
29 The results of this pilot study are limited by the small sample size and self-imposed limitation  
30 on the collection of participant characteristics in order to preserve anonymity. A key  
31 component of the MSC technique is sharing personal stories. This presents challenges for  
32 maintaining confidentiality. The sample size and close working relationships meant  
33 maintaining anonymity could not be guaranteed. We addressed this by disaggregating stories,  
34 and by ensuring participants were informed that they may be identified.  
35  
36  
37  
38  
39

40  
41 Over the last few years, there has been a greater focus on the nurturing of emotional  
42 intelligence. Many of these efforts have involved self-directed learning, action coaching and  
43 formalised mentoring programs.[33] These attempts have faced substantial system-based  
44 obstacles and have, at times, paradoxically penalised the individual doctor for failing to self-  
45 care. Doctors in training are a highly goal motivated group, yet messages that a lack of  
46 resilience, weakness, and laziness typify those who succumb to these stressors is  
47 enduring.[3,7,33] The harm from erroneous messages sent through labelling doctors as super-  
48 humans is also well documented; often as a gesture of thanks this culture lends itself to  
49 messages of the need to 'tough it out'.[34] Together, these run the risk of adding to the  
50 misconception that seeking help is a sign of weakness, failure and not having what it takes to  
51 survive the rigors of medical training.  
52  
53  
54  
55  
56  
57  
58  
59  
60



1  
2  
3  
4 In co-designing our program, we were able to create a system of resources, which were  
5 meaningful and useful. In combination with a solid commitment from the organisation to  
6 support and see through the delivery of the program, we effectively created a cultural shift and  
7 built capacity with a lasting impact for our team. The provision of programs with a directive to  
8 protect and prevent healthcare workers from burnout is desperately needed. Interventions must  
9 be directed and targeted, recognising time constraints, transient working locations and  
10 competing demands. Additionally, their evaluation is imperative.[7] It is vital that doctors feel  
11 safe to seek help, and more importantly administrators need to identify, track and monitor the  
12 wellbeing of employees and act well before crisis point is reached [35].  
13  
14  
15  
16  
17  
18  
19

20 We have successfully used a mixed-methods approach to contextualise a productive program  
21 to improve the wellbeing of COVID-19 frontline healthcare workers. We hope the evidence  
22 generated from our program contributes to informing the implementation of future programs  
23 within other healthcare groups and settings.  
24  
25  
26  
27  
28

### 29 **Funding**

30 The ‘Monash Women’s leading kindness COVID-19 toolkit’ wellbeing program and its  
31 evaluation was funded by Monash Health Foundation grant. The program and analysis were  
32 undertaken independently and without influence from the funding body.  
33  
34  
35  
36

### 37 **Acknowledgments**

38 The Pandemic Kindness Movement was a vital resource for inspiration and implementation of  
39 the program. We would like to thank the A/Prof Jane Munro along with all the clinicians and  
40 experts who contributed and curated this wonderful collection of information in such a user  
41 friendly and available format.  
42  
43  
44  
45  
46

47 We would like to acknowledge the overarching guidance provided by A/Prof Jacqueline Boyle  
48 and A/Prof Arunaz Kumar who were instrumental in the planning of the project and evaluation  
49 processes.  
50  
51  
52  
53

54 We would also like to extend our gratitude to A/Prof Beverly Vollenhoven, Dr Mark Tarrant,  
55 Dr Risha Bhatia and A/Prof Arunaz whose participation and feedback were crucial to the  
56 success of the evaluation.  
57  
58  
59  
60

1  
2  
3  
4 We would also like to thank the Monash Women's O&G DiT who co-designed this pilot project  
5 along-side us. Especially to those who took the time to participate, present and provided vital  
6 feedback during a time in which they were most under the pump. Without your efforts there  
7 would be no program to report on.  
8  
9

### 10 11 12 **Licence agreement**

13 "The Corresponding Author has the right to grant on behalf of all authors and does grant on  
14 behalf of all authors, a worldwide licence to the Publishers and its licensees in perpetuity, in  
15 all forms, formats and media (whether known now or created in the future), to i) publish,  
16 reproduce, distribute, display and store the Contribution, ii) translate the Contribution into other  
17 languages, create adaptations, reprints, include within collections and create summaries,  
18 extracts and/or, abstracts of the Contribution, iii) create any other derivative work(s) based on  
19 the Contribution, iv) to exploit all subsidiary rights in the Contribution, v) the inclusion of  
20 electronic links from the Contribution to third party material where-ever it may be located; and,  
21 vi) licence any third party to do any or all of the above." (BMJ Author Guidelines, 2021)  
22  
23  
24  
25  
26  
27  
28  
29

### 30 31 **Competing interest**

32 "All authors have completed the Unified Competing Interest form (available on request from  
33 the corresponding author) and declare: support from Monash Health Foundation COVID-19  
34 Research grant for the submitted work; no financial relationships with any organisations that  
35 might have an interest in the submitted work in the previous three years, no other relationships  
36 or activities that could appear to have influenced the submitted work." (BMJ Author  
37 Guidelines, 2021)  
38  
39  
40  
41  
42  
43

### 44 45 **Data sharing**

46 We commit to undertaking all reasonable requests to share relevant data.  
47  
48

### 49 50 **Figures**

51 Figure 1: Pyramid of Needs

52 Figure 2: Goals of the 'Monash Women's leading kindness COVID-19 toolkit'

53 Figure 3: MSC selection process

54 Figure 4: Repeated measures CBI and WHO-5 scores for all and restricted to those who  
55 participated in the 'Monash Women's leading kindness COVID-19 toolkit' workshops.  
56  
57

58 Figure 5: Themes revealed by stories which came together to shift the workplace culture.  
59  
60

## References

1. Bridson TL, Jenkins K, Allen KG, McDermott BM. PPE for your mind: a peer support initiative for health care workers. *Med. J. Aust.* 2020 Dec 8.
2. Ellis R, Hay-David AG, Brennan PA. Operating during the COVID-19 pandemic: How to reduce medical error. *British Journal of Oral and Maxillofacial Surgery.* 2020 Jun 1;58(5):577-80.
3. Selamu M, Thornicroft G, Fekadu A, Hanlon C. Conceptualisation of job-related wellbeing, stress and burnout among healthcare workers in rural Ethiopia: a qualitative study. *BMC health services research.* 2017 Dec;17(1):1-1.
4. Strauss C, Gu J, Pitman N, Chapman C, Kuyken W, Whittington A. Evaluation of mindfulness-based cognitive therapy for life and a cognitive behavioural therapy stress-management workshop to improve healthcare staff stress: study protocol for two randomised controlled trials. *Trials.* 2018 Dec;19(1):1-0.
5. Pescud M, Teal R, Shilton T, Slevin T, Ledger M, Waterworth P, Rosenberg M. Employers' views on the promotion of workplace health and wellbeing: a qualitative study. *BMC public health.* 2015 Dec;15(1):1-0.
6. Chanchlani S, Chang D, Ong JS, Anwar A. The value of peer mentoring for the psychosocial wellbeing of junior doctors: a randomised controlled study. *Medical Journal of Australia.* 2018 Nov;209(9):401-5.
7. Forbes M, Byrom L, van der Steenstraten I, Markwell A, Bretherton H, Kay M. Resilience on the Run: an evaluation of a well-being programme for medical interns. *Internal medicine journal.* 2020 Jan;50(1):92-9.
8. Markwell AL, Wainer Z. The health and wellbeing of junior doctors: insights from a national survey. *Medical Journal of Australia.* 2009 Oct;191(8):441-4.
9. Palmer KR, Tanner M, Davies-Tuck M, Rindt A, Papacostas K, Giles ML, Brown K, Diamandis H, Fradkin R, Stewart AE, Rolnik DL. Widespread implementation of a low-cost telehealth service in the delivery of antenatal care during the COVID-19 pandemic: an interrupted time-series analysis. *The Lancet.* 2021 Jul 3;398(10294):41-52.
10. Russell J, Berney L, Stansfeld S, Lanz D, Kerry S, Chandola T, Bhui K. The role of qualitative research in adding value to a randomised controlled trial: lessons from a pilot study of a guided e-learning intervention for managers to improve employee wellbeing and reduce sickness absence. *Trials.* 2016 Dec;17(1):1-1.

11. Topp CW, Østergaard SD, Søndergaard S, Bech P. The WHO-5 Well-Being Index: a systematic review of the literature. *Psychotherapy and psychosomatics*. 2015;84(3):167-76.
12. Kristensen TS, Borritz M, Villadsen E, Christensen KB. The Copenhagen Burnout Inventory: A new tool for the assessment of burnout. *Work & Stress*. 2005 Jul 1;19(3):192-207.
13. Ning L, Weavell W, Woodhouse W. *Mental Health Experience Co-Design: A Quality Improvement Initiative*. Melbourne, Australia: Tandem Carers. 2010.
14. Maslow AH. Preface to motivation theory. *Psychosomatic medicine*. 1943.
15. Beyond Blue. (2020). Protecting your mental health and wellbeing as a healthcare worker. <https://coronavirus.beyondblue.org.au/impacts-on-my-work/essential-services/protecting-your-mental-health-and-wellbeing-healthcare-worker.html>. Accessed 13 August, 2021
16. Crinall K & Crinall W. Monash Women's Leading Kindness COVID-19 Toolkit Pilot Project. Most Significant Change Technique Evaluation Report. 2021. In press
17. Ward M, McDonald R, Aridas J, Rolnik DL. Monash Women's Leading Kindness COVID-19 Toolkit Pilot Project Quantitative Evaluation Report. 2021. In press
18. Ward M, McDonald R, Aridas J, Rolnik DL. Start Up: Leading Kindness COVID-19 Toolkit. 2021. In press
19. Thrush CR, Guise JB, Gathright MM, Messias E, Flynn V, Belknap T, Thapa PB, Williams DK, Nada EM, Clardy JA. A one-year institutional view of resident physician burnout. *Academic Psychiatry*. 2019 Aug;43(4):361-8.
20. Dart J & Davies R. A Dialogical, Story-Based Evaluation Tool: The Most Significant Change Technique. *American Journal of Evaluation*. 2003. 24(2):137–155.
21. Crinall K, Ward M, McDonald R, Crinall W, Aridas J, Quittner D, Leung C, Hodges R, Rolnik DL. Evaluating a peer-led wellbeing program for doctors-in-training during the COVID-19 pandemic in Victoria, Australia using the Most Significant Change technique. 2021. Under review
22. Davies, R., & Dart, J. (2005). *The 'Most Significant Change' (MSC) Technique, A guide to its Use*. [https://www.researchgate.net/publication/275409002\\_The\\_'Most\\_Significant\\_Change'\\_MSC\\_Technique\\_A\\_Guide\\_to\\_Its\\_Use](https://www.researchgate.net/publication/275409002_The_'Most_Significant_Change'_MSC_Technique_A_Guide_to_Its_Use) (accessed 26 Feb 2021)
23. Olagunju AT, Bioku AA, Olagunju TO, Sarimiye FO, Onwuameze OE, Halbreich U. Psychological distress and sleep problems in healthcare workers in a developing context

- 1  
2  
3  
4 during COVID-19 pandemic: Implications for workplace wellbeing. *Progress in Neuro-*  
5 *Psychopharmacology and Biological Psychiatry*. 2021 Aug 30;110:110292.  
6  
7 24. Rahman MA, Hoque N, Alif SM, Salehin M, Islam SM, Banik B, Sharif A, Nazim NB,  
8 Sultana F, Cross W. Factors associated with psychological distress, fear and coping  
9 strategies during the COVID-19 pandemic in Australia. *Globalization and Health*. 2020  
10 Dec;16(1):1-5.  
11  
12 25. Shreffler J, Petrey J, Huecker M. The impact of COVID-19 on healthcare worker  
13 wellness: A scoping review. *Western Journal of Emergency Medicine*. 2020  
14 Sep;21(5):1059.  
15  
16 26. Australian Government National Mental Health Commission. National Mental Health  
17 and Wellbeing Pandemic Response Plan.  
18 [https://www.mentalhealthcommission.gov.au/mental-health-and-wellbeing-pandemic-](https://www.mentalhealthcommission.gov.au/mental-health-and-wellbeing-pandemic-response-plan)  
19 [response-plan](https://www.mentalhealthcommission.gov.au/mental-health-and-wellbeing-pandemic-response-plan). Accessed: 08 July 2021  
20  
21 27. Heath C, Sommerfield A, von Ungern-Sternberg BS. Resilience strategies to manage  
22 psychological distress among healthcare workers during the COVID-19 pandemic: a  
23 narrative review. *Anaesthesia*. 2020 Oct;75(10):1364-71.  
24  
25 28. Lupton D. Timeline of COVID-19 in Australia: the first year.  
26 <https://deborahalupton.medium.com/timeline-of-covid-19-in-australia-1f7df6ca5f23>  
27 Accessed: 12 July 2021  
28  
29 29. Kane L. 'Death by 1000 Cuts': Medscape National Physician Burnout & Suicide Report  
30 2021 <https://www.medscape.com/slideshow/2021-lifestyle-burnout-6013456#1>.  
31 Accessed 19 July, 2021  
32  
33 30. Ochsmann E, Lang J, Drexler H, Schmid K. Stress and recovery in junior doctors.  
34 *Postgraduate medical journal*. 2011 Sep 1;87(1031):579-84.  
35  
36 31. Killian KD. Helping till it hurts? A multimethod study of compassion fatigue, burnout,  
37 and self-care in clinicians working with trauma survivors. *Traumatology*. 2008  
38 Jun;14(2):32-44.  
39  
40 32. Lewin S, Glenton C, Oxman AD. Use of qualitative methods alongside randomised  
41 controlled trials of complex healthcare interventions: methodological study. *Bmj*. 2009  
42 Sep 10;339.  
43  
44 33. Walton M, Harrison R, Burgess A, Foster K. Workplace training for senior trainees: a  
45 systematic review and narrative synthesis of current approaches to promote patient  
46 safety. *Postgraduate medical journal*. 2015 Oct 1;91(1080):579-87.  
47  
48  
49  
50  
51  
52  
53  
54  
55  
56  
57  
58  
59  
60

- 1  
2  
3  
4 34. Scheele F, Novak Z, Vetter K, Caccia N, Goverde A. Obstetrics and gynaecology  
5 training in Europe needs a next step. *European Journal of Obstetrics & Gynecology and*  
6 *Reproductive Biology*. 2014 Sep 1;180:130-2.  
7  
8  
9 35. Blake T, Whallett A. Leadership and the medical registrar: how can organisations  
10 support these unsung heroes?. *Postgraduate medical journal*. 2016 Dec 1;92(1094):735-  
11 40.  
12  
13 36. Halliday L, Walker A, Vig S, Hines J, Brecknell J. Grit and burnout in UK doctors: a  
14 cross-sectional study across specialties and stages of training. *Postgraduate medical*  
15 *journal*. 2017 Jul 1;93(1101):389-94.  
16  
17 37. Card AJ. Physician burnout: resilience training is only part of the solution. *The Annals*  
18 *of Family Medicine*. 2018 May 1;16(3):267-70.  
19  
20  
21  
22  
23  
24  
25  
26  
27  
28  
29  
30  
31  
32  
33  
34  
35  
36  
37  
38  
39  
40  
41  
42  
43  
44  
45  
46  
47  
48  
49  
50  
51  
52  
53  
54  
55  
56  
57  
58  
59  
60

1  
2  
3  
4  
5  
6  
7  
8  
9  
10  
11  
12  
13  
14  
15  
16  
17  
18  
19  
20  
21  
22  
23  
24  
25  
26  
27  
28  
29  
30  
31  
32  
33  
34  
35  
36  
37  
38  
39  
40  
41  
42  
43  
44  
45  
46

**Leadership actions  
and behaviours**

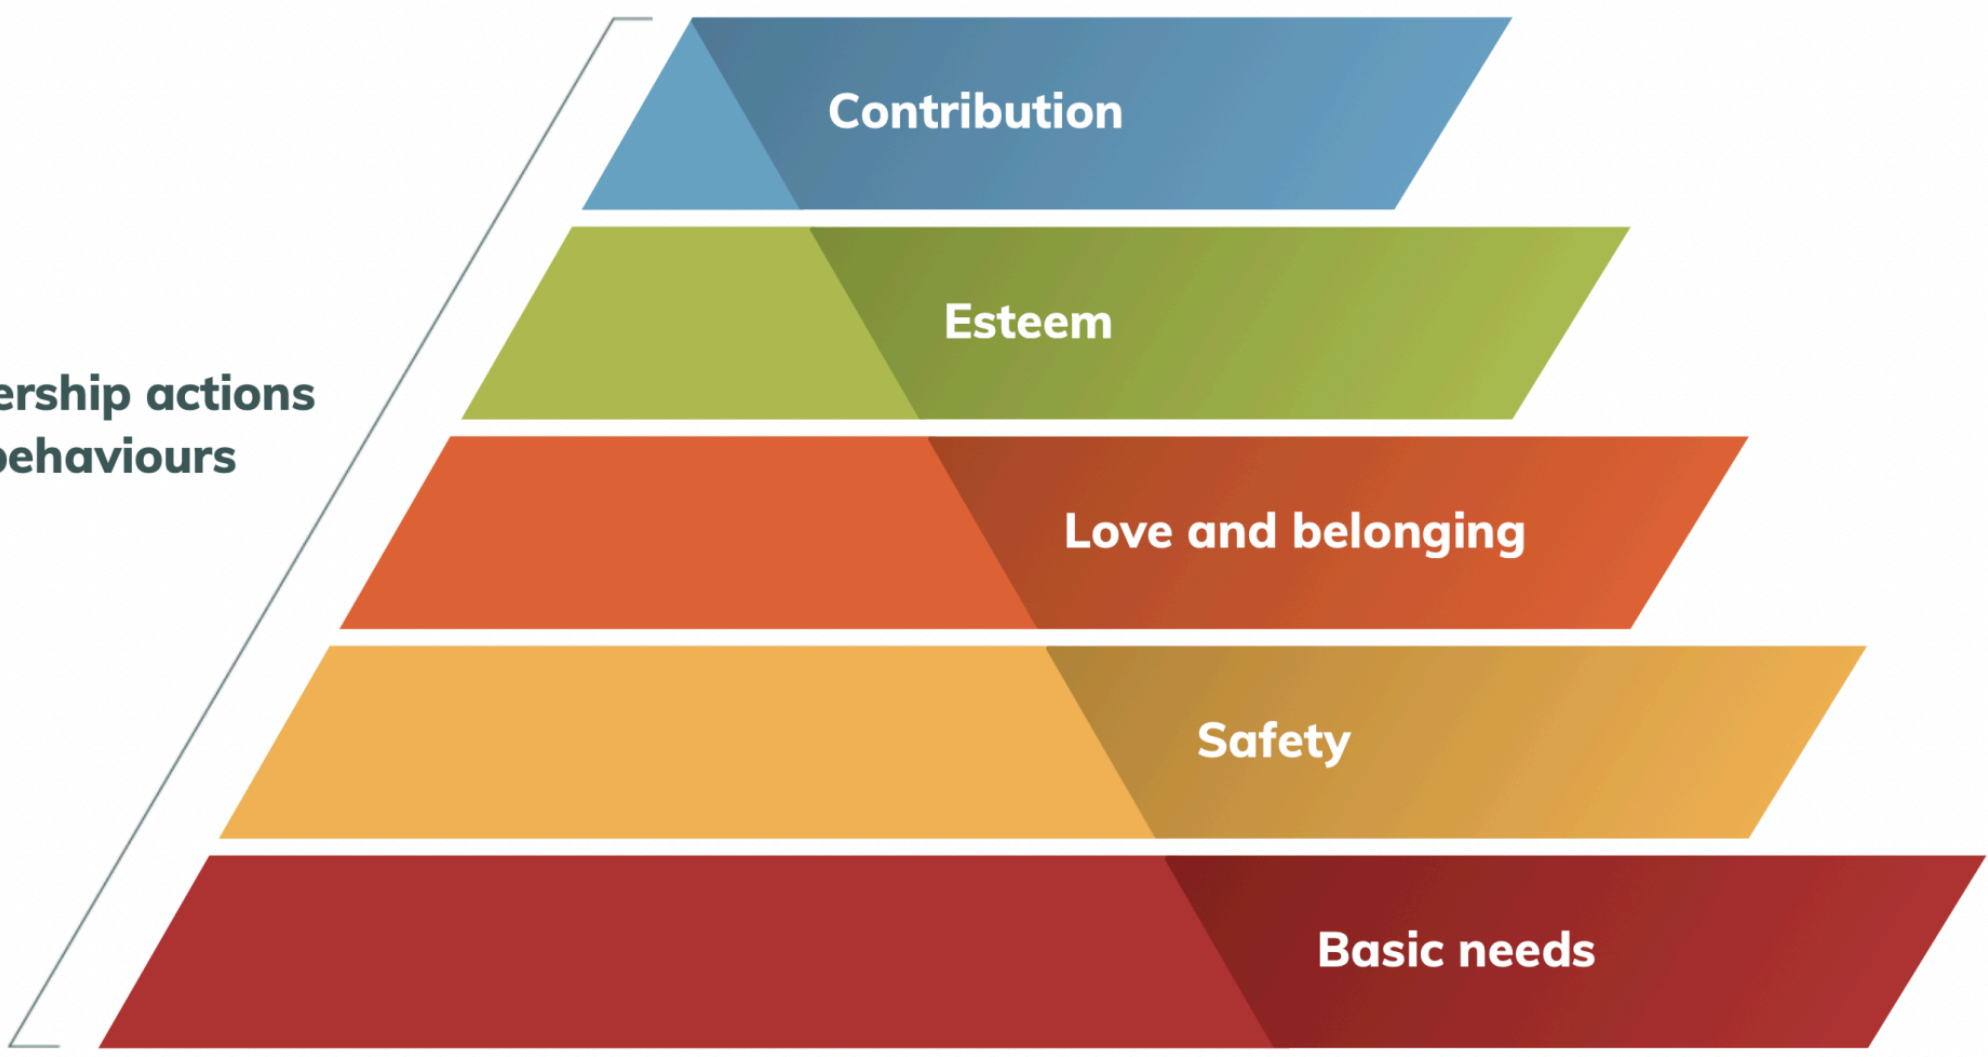

Connecting health workers and communities

# PYRAMID OF NEEDS

**Goal 1**

Getting enough rest during work hours and between shifts

- To support the existing structures to ensure work hours are safe; to foster flexibility; to role-model work-life balance; to monitor workloads and provide support for O&G DiT who are struggling

**Goal 2**

Eating healthy foods and engaging in physical activity

- To use environment and people-centred approaches to encourage and support O&G DiT to access healthy food options; to improve hydration in the workplace. To build opportunities to be active at work and home.

**Goal 3**

Being aware of where you can access mental health support at work

- To ensure the O&G DiT understands the risk to wellbeing during COVID-19, how to access additional services, and what roles they can play in helping each other stay well

**Goal 4**

Keeping in contact with colleagues, family and friends

- To foster a culture of care and support for the O&G DiT. To provide opportunities for connection and community

**Goal 5**

Advocating for management to create mentally healthy work structures

- To advocate for organisational prioritisation of wellbeing. To support the growth and development of the O&G DiT team



1  
2  
3  
4  
5  
6  
7  
8  
9  
10  
11  
12  
13  
14  
15  
16  
17  
18  
19  
20  
21  
22  
23  
24  
25  
26  
27  
28  
29  
30  
31  
32  
33  
34  
35  
36  
37  
38  
39  
40  
41  
42  
43  
44  
45  
46

FC

✓

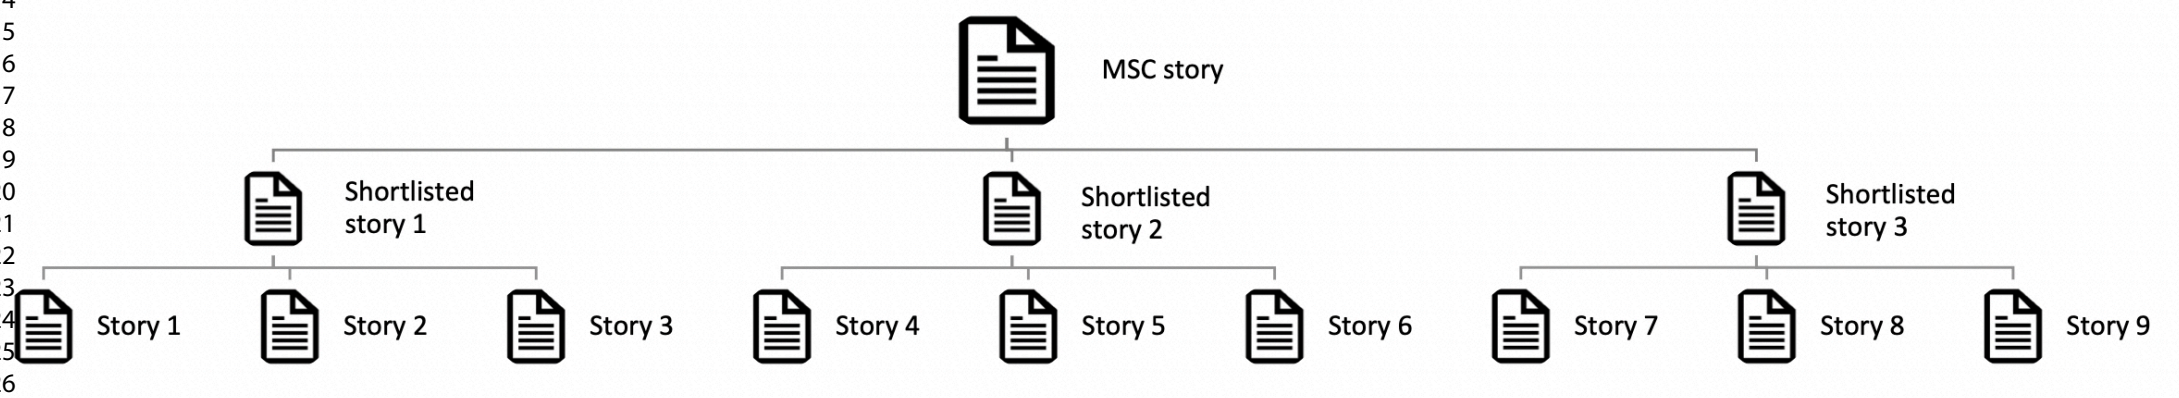

CBI

WHO-5

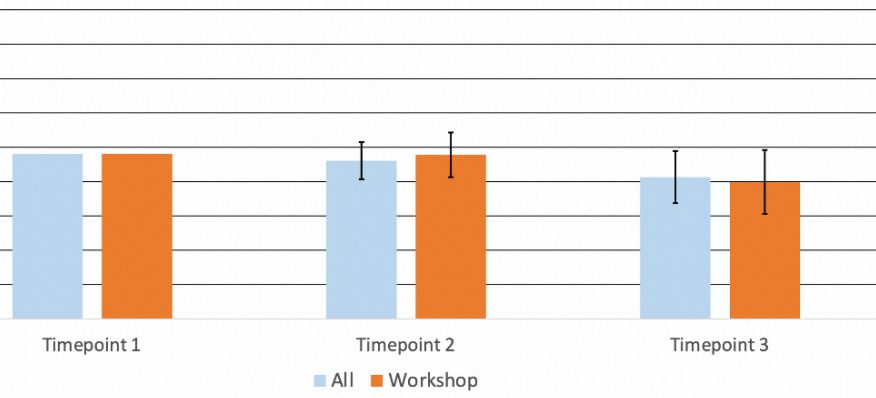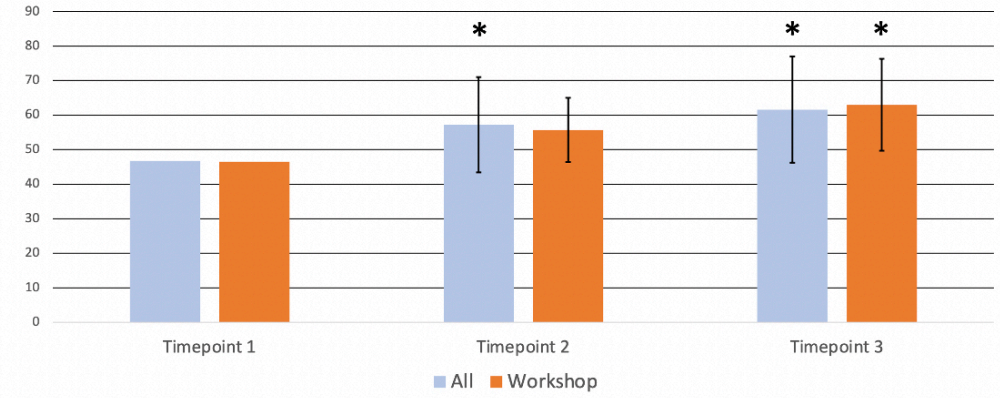

\* indicates a significant difference in WHO-5 score compared the baseline

1  
2  
3  
4  
5  
6  
7  
8  
9  
10  
11  
12  
13  
14  
15  
16  
17  
18  
19  
20  
21  
22  
23  
24  
25  
26  
27  
28  
29  
30  
31  
32  
33  
34  
35  
36  
37  
38  
39  
40  
41  
42  
43  
44  
45  
46  
47  
48  
49  
50  
51  
52  
53  
54  
55  
56  
57  
58  
59  
60

**Connection**

- Senior trainee doctors sharing vulnerabilities with junior trainees
- Teamwork—helping each other
- Workspace revamp—creating an organised, welcoming office space
- Knowing where to get help if needed

**Caring**

- Meeting basic needs—caring for self and each other
- Link between caring for self and improved patient care

**Communication**

- Flattening of hierarchy across levels
- Giving and receiving feedback
- Normalising open communication
- Increased interactions with colleagues

**Confidence**

- In leadership capacity
- In teams
- In ability to look after basic needs

**Cooperation**

- Co-design
- Peer leadership
- Peer to peer learning
- Working together

**CULTURAL CHANGE**

## Appendix 1

### PARTICIPANT QUESTIONNAIRE

Copenhagen Burnout Inventory & World Health Organisation Well-being Index (WHO-5)  
*To be collected utilising anonymised platform*

#### CBI Part one: Personal burnout

*Always, often, sometimes, seldom, never/almost never*

1. How often do you feel tired?
2. How often are you physically exhausted?
3. How often are you emotionally exhausted?
4. How often do you think: "I can't take it anymore"?
5. How often do you feel worn out?
6. How often do you feel weak and susceptible to illness?

#### CBI Part two: Work-related burnout

*To a very high degree, to a high degree, somewhat, to a low degree, to a very low degree*

1. Is your work emotionally exhausting?
2. Do you feel burnt out because of your work?
3. Does your work frustrate you?
4. So you feel worn out at the end of the working day?
5. Are you exhausted in the morning at the thought of another day at work?
6. Do you feel that every working hour is tiring for you?
7. Do you have enough energy for family and friends during leisure time?

#### CBI Part three: Patient-related burnout

*Always, often, sometimes, seldom, never/almost never*

1. Do you find it hard to work with patients?
2. Do you find it frustrating to work with patients?
3. Does it drain your energy to work with patients?
4. Do you feel that you give more than you get back when you work with patients?
5. Are you tired of working with patients?
6. Do you sometimes wonder how long you will be able to continue working with patients?

#### WHO-5

*All of the time, most of the time, more than half of the time, less than half of the time, some of the time, no time*

1. I have felt cheerful and in good spirits
2. I have felt calm and relaxed
3. I have felt active and vigorous
4. I woke up feeling fresh and rested
5. My daily life has been filled with things that interest me

## Appendix 2

### Most Significant Change (MSC) Story Guidelines

The MSC method involves three main steps:

1. Collection of Significant Change stories from project participants.
2. Selection of Most Significant Change story, and identification of key themes.
3. Documenting and communicating the Most Significant Change stories in a report so that the program can be improved, and so others may learn about the program and its effects.

You can write or communicate your story in any way you like. The questions are provided as prompts to help frame your story; you can write as much or as little as you want for each point.

- How has COVID-19 pandemic affected your life: Personally and Professionally?
- How were you feeling before the program began?
- Which aspects of the [insert organisation] program did you make use of/experience/participate in?
- Did anything in your life change, either professionally or personally as a result of the 'Leading Kindness COVID-19 Toolkit' wellbeing program?
  - o YES/NO If your answer is NO, please tell us why you think this was the case.
  - o If YES, what changed? (How are things different now?)
- Why do you think these changes happened?
  - o When did the change/s happen?
  - o How did the change/s to happen?
- What was the most important change for you? And Why was this change so important for you?
- Did you have any 'AHA' moments as a result of the 'Leading Kindness COVID-19 Toolkit' wellbeing program? What were they?
- Is there anything else you would like to tell us about your experience of the 'Leading Kindness COVID-19 Toolkit' wellbeing program?
- Is there anything you would like to suggest about further development of the 'Leading Kindness COVID-19 Toolkit' wellbeing program?

## STROBE Statement—checklist of items that should be included in reports of observational studies

|                              | Item No | Recommendation                                                                                                                                                                                                                                                                                                                                                                                                                                                         | Page No |
|------------------------------|---------|------------------------------------------------------------------------------------------------------------------------------------------------------------------------------------------------------------------------------------------------------------------------------------------------------------------------------------------------------------------------------------------------------------------------------------------------------------------------|---------|
| <b>Title and abstract</b>    | 1       | (a) Indicate the study's design with a commonly used term in the title or the abstract                                                                                                                                                                                                                                                                                                                                                                                 | 1       |
|                              |         | (b) Provide in the abstract an informative and balanced summary of what was done and what was found                                                                                                                                                                                                                                                                                                                                                                    | 1       |
| <b>Introduction</b>          |         |                                                                                                                                                                                                                                                                                                                                                                                                                                                                        |         |
| Background/rationale         | 2       | Explain the scientific background and rationale for the investigation being reported                                                                                                                                                                                                                                                                                                                                                                                   | 2       |
| Objectives                   | 3       | State specific objectives, including any prespecified hypotheses                                                                                                                                                                                                                                                                                                                                                                                                       | 3       |
| <b>Methods</b>               |         |                                                                                                                                                                                                                                                                                                                                                                                                                                                                        |         |
| Study design                 | 4       | Present key elements of study design early in the paper                                                                                                                                                                                                                                                                                                                                                                                                                | 3       |
| Setting                      | 5       | Describe the setting, locations, and relevant dates, including periods of recruitment, exposure, follow-up, and data collection                                                                                                                                                                                                                                                                                                                                        | 3       |
| Participants                 | 6       | (a) <i>Cohort study</i> —Give the eligibility criteria, and the sources and methods of selection of participants. Describe methods of follow-up<br><i>Case-control study</i> —Give the eligibility criteria, and the sources and methods of case ascertainment and control selection. Give the rationale for the choice of cases and controls<br><i>Cross-sectional study</i> —Give the eligibility criteria, and the sources and methods of selection of participants | 3–6     |
|                              |         | (b) <i>Cohort study</i> —For matched studies, give matching criteria and number of exposed and unexposed<br><i>Case-control study</i> —For matched studies, give matching criteria and the number of controls per case                                                                                                                                                                                                                                                 |         |
| Variables                    | 7       | Clearly define all outcomes, exposures, predictors, potential confounders, and effect modifiers. Give diagnostic criteria, if applicable                                                                                                                                                                                                                                                                                                                               | 5       |
| Data sources/<br>measurement | 8*      | For each variable of interest, give sources of data and details of methods of assessment (measurement). Describe comparability of assessment methods if there is more than one group                                                                                                                                                                                                                                                                                   | 5       |
| Bias                         | 9       | Describe any efforts to address potential sources of bias                                                                                                                                                                                                                                                                                                                                                                                                              | 5       |
| Study size                   | 10      | Explain how the study size was arrived at                                                                                                                                                                                                                                                                                                                                                                                                                              |         |
| Quantitative variables       | 11      | Explain how quantitative variables were handled in the analyses. If applicable, describe which groupings were chosen and why                                                                                                                                                                                                                                                                                                                                           | 5       |
| Statistical methods          | 12      | (a) Describe all statistical methods, including those used to control for confounding                                                                                                                                                                                                                                                                                                                                                                                  | 5       |
|                              |         | (b) Describe any methods used to examine subgroups and interactions                                                                                                                                                                                                                                                                                                                                                                                                    | 5       |
|                              |         | (c) Explain how missing data were addressed                                                                                                                                                                                                                                                                                                                                                                                                                            | 5       |
|                              |         | (d) <i>Cohort study</i> —If applicable, explain how loss to follow-up was addressed<br><i>Case-control study</i> —If applicable, explain how matching of cases and controls was addressed<br><i>Cross-sectional study</i> —If applicable, describe analytical methods taking account of sampling strategy                                                                                                                                                              | n/a     |
|                              |         | (e) Describe any sensitivity analyses                                                                                                                                                                                                                                                                                                                                                                                                                                  | 5       |

Continued on next page

1  
2  
3  
4  
5  
6  
7  
8  
9  
10  
11  
12  
13  
14  
15  
16  
17  
18  
19  
20  
21  
22  
23  
24  
25  
26  
27  
28  
29  
30  
31  
32  
33  
34  
35  
36  
37  
38  
39  
40  
41  
42  
43  
44  
45  
46  
47  
48  
49  
50  
51  
52  
53  
54  
55  
56  
57  
58  
59  
60

| <b>Results</b>           |     |                                                                                                                                                                                                              |     |
|--------------------------|-----|--------------------------------------------------------------------------------------------------------------------------------------------------------------------------------------------------------------|-----|
| Participants             | 13* | (a) Report numbers of individuals at each stage of study—eg numbers potentially eligible, examined for eligibility, confirmed eligible, included in the study, completing follow-up, and analysed            | 6   |
|                          |     | (b) Give reasons for non-participation at each stage                                                                                                                                                         | 6   |
|                          |     | (c) Consider use of a flow diagram                                                                                                                                                                           |     |
| Descriptive data         | 14* | (a) Give characteristics of study participants (eg demographic, clinical, social) and information on exposures and potential confounders                                                                     |     |
|                          |     | (b) Indicate number of participants with missing data for each variable of interest                                                                                                                          |     |
|                          |     | (c) <i>Cohort study</i> —Summarise follow-up time (eg, average and total amount)                                                                                                                             | 6-7 |
| Outcome data             | 15* | <i>Cohort study</i> —Report numbers of outcome events or summary measures over time                                                                                                                          | 7   |
|                          |     | <i>Case-control study</i> —Report numbers in each exposure category, or summary measures of exposure                                                                                                         |     |
|                          |     | <i>Cross-sectional study</i> —Report numbers of outcome events or summary measures                                                                                                                           |     |
| Main results             | 16  | (a) Give unadjusted estimates and, if applicable, confounder-adjusted estimates and their precision (eg, 95% confidence interval). Make clear which confounders were adjusted for and why they were included | 7   |
|                          |     | (b) Report category boundaries when continuous variables were categorized                                                                                                                                    | 7   |
|                          |     | (c) If relevant, consider translating estimates of relative risk into absolute risk for a meaningful time period                                                                                             |     |
| Other analyses           | 17  | Report other analyses done—eg analyses of subgroups and interactions, and sensitivity analyses                                                                                                               | 8   |
| <b>Discussion</b>        |     |                                                                                                                                                                                                              |     |
| Key results              | 18  | Summarise key results with reference to study objectives                                                                                                                                                     | 9   |
| Limitations              | 19  | Discuss limitations of the study, taking into account sources of potential bias or imprecision. Discuss both direction and magnitude of any potential bias                                                   | 11  |
| Interpretation           | 20  | Give a cautious overall interpretation of results considering objectives, limitations, multiplicity of analyses, results from similar studies, and other relevant evidence                                   | 12  |
| Generalisability         | 21  | Discuss the generalisability (external validity) of the study results                                                                                                                                        | 12  |
| <b>Other information</b> |     |                                                                                                                                                                                                              |     |
| Funding                  | 22  | Give the source of funding and the role of the funders for the present study and, if applicable, for the original study on which the present article is based                                                | 12  |

\*Give information separately for cases and controls in case-control studies and, if applicable, for exposed and unexposed groups in cohort and cross-sectional studies.

**Note:** An Explanation and Elaboration article discusses each checklist item and gives methodological background and published examples of transparent reporting. The STROBE checklist is best used in conjunction with this article (freely available on the Web sites of PLoS Medicine at <http://www.plosmedicine.org/>, Annals of Internal Medicine at <http://www.annals.org/>, and Epidemiology at <http://www.epidem.com/>). Information on the STROBE Initiative is available at [www.strobe-statement.org](http://www.strobe-statement.org).

# BMJ Open

## The kindness COVID-19 toolkit: a mixed methods evaluation of a program designed by doctors in training for doctors in training.

|                                 |                                                                                                                                                                                                                                                                                                                                                                                                                                                                                                                                                                                                                                                                                                               |
|---------------------------------|---------------------------------------------------------------------------------------------------------------------------------------------------------------------------------------------------------------------------------------------------------------------------------------------------------------------------------------------------------------------------------------------------------------------------------------------------------------------------------------------------------------------------------------------------------------------------------------------------------------------------------------------------------------------------------------------------------------|
| Journal:                        | <i>BMJ Open</i>                                                                                                                                                                                                                                                                                                                                                                                                                                                                                                                                                                                                                                                                                               |
| Manuscript ID                   | bmjopen-2021-060575.R1                                                                                                                                                                                                                                                                                                                                                                                                                                                                                                                                                                                                                                                                                        |
| Article Type:                   | Original research                                                                                                                                                                                                                                                                                                                                                                                                                                                                                                                                                                                                                                                                                             |
| Date Submitted by the Author:   | 17-Aug-2022                                                                                                                                                                                                                                                                                                                                                                                                                                                                                                                                                                                                                                                                                                   |
| Complete List of Authors:       | Ward, Madeleine; Monash University, Obstetrics & Gynaecology; Monash Health, Women's & Newborn<br>Crinall, Karen; Crinall Consulting<br>McDonald, Rebecca; Monash Health, Women's & Newborn; Monash University, Obstetrics & Gynaecology<br>Crinall, William; Crinall Consulting<br>Aridas, James; Monash Health, Women's & Newborn; Hudson Institute of Medical Research, The Ritchie Centre<br>Leung, Cheryl; Monash Health, Women's & Newborn<br>Quittner, Danielle; Monash Health, Women's & Newborn<br>Hodges, Ryan J; Monash Health, Women's & Newborn; Monash University, Obstetrics & Gynaecology<br>Rolnik, Daniel ; Monash Health, Women's & Newborn; Monash University, Obstetrics and Gynaecology |
| <b>Primary Subject Heading</b>: | Obstetrics and gynaecology                                                                                                                                                                                                                                                                                                                                                                                                                                                                                                                                                                                                                                                                                    |
| Secondary Subject Heading:      | Medical education and training, Qualitative research                                                                                                                                                                                                                                                                                                                                                                                                                                                                                                                                                                                                                                                          |
| Keywords:                       | COVID-19, OBSTETRICS, QUALITATIVE RESEARCH                                                                                                                                                                                                                                                                                                                                                                                                                                                                                                                                                                                                                                                                    |
|                                 |                                                                                                                                                                                                                                                                                                                                                                                                                                                                                                                                                                                                                                                                                                               |

SCHOLARONE™  
Manuscripts





I, the Submitting Author has the right to grant and does grant on behalf of all authors of the Work (as defined in the below author licence), an exclusive licence and/or a non-exclusive licence for contributions from authors who are: i) UK Crown employees; ii) where BMJ has agreed a CC-BY licence shall apply, and/or iii) in accordance with the terms applicable for US Federal Government officers or employees acting as part of their official duties; on a worldwide, perpetual, irrevocable, royalty-free basis to BMJ Publishing Group Ltd ("BMJ") its licensees and where the relevant Journal is co-owned by BMJ to the co-owners of the Journal, to publish the Work in this journal and any other BMJ products and to exploit all rights, as set out in our [licence](#).

The Submitting Author accepts and understands that any supply made under these terms is made by BMJ to the Submitting Author unless you are acting as an employee on behalf of your employer or a postgraduate student of an affiliated institution which is paying any applicable article publishing charge ("APC") for Open Access articles. Where the Submitting Author wishes to make the Work available on an Open Access basis (and intends to pay the relevant APC), the terms of reuse of such Open Access shall be governed by a Creative Commons licence – details of these licences and which [Creative Commons](#) licence will apply to this Work are set out in our licence referred to above.

Other than as permitted in any relevant BMJ Author's Self Archiving Policies, I confirm this Work has not been accepted for publication elsewhere, is not being considered for publication elsewhere and does not duplicate material already published. I confirm all authors consent to publication of this Work and authorise the granting of this licence.

**Title:**

The kindness COVID-19 toolkit: a mixed methods evaluation of a program designed by doctors in training for doctors in training.

**Authors:**

Madeleine C Ward<sup>1,2</sup> (0000-0001-6501-7151), Karen Crinall<sup>3</sup>, Rebecca McDonald<sup>1,2</sup>, William Crinall<sup>3</sup>, James Aridas<sup>1,4</sup>, Cheryl Leung<sup>1</sup>, Danielle Quittner<sup>1</sup>, Ryan J Hodges<sup>1,2</sup>, Daniel L Rolnik<sup>1,2</sup>

**Addresses:**

1. Department of Obstetrics and Gynaecology, Monash Health, Clayton, VIC, 3168, Australia
2. Monash University, Clayton, VIC, 3168, Australia
3. Crinall Consulting, VIC, Australia
4. The Ritchie Centre, Hudson Institute of Medical Research, Clayton, VIC, 3168, Australia

**Corresponding author:**

Dr Madeleine C Ward

Monash University

Wellington Road

Clayton, 3800, Victoria, Australia

madeleine.ward@monash.edu

1  
2  
3  
4  
5  
6  
7  
8  
9  
10  
11  
12  
13  
14  
15  
16  
17  
18  
19  
20  
21  
22  
23  
24  
25  
26  
27  
28  
29  
30  
31  
32  
33  
34  
35  
36  
37  
38  
39  
40  
41  
42  
43  
44  
45  
46  
47  
48  
49  
50  
51  
52  
53  
54  
55  
56  
57  
58  
59  
60

For peer review only

1  
2  
3  
4  
5  
6 **The kindness COVID-19 toolkit: a mixed methods evaluation of a program designed by**  
7 **doctors in training for doctors in training.**  
8  
9

10  
11 Madeleine C Ward<sup>1,2</sup>, Karen Crinall<sup>3</sup>, Rebecca McDonald<sup>1,2</sup>, William Crinall<sup>3</sup>, James Aridas<sup>1,4</sup>,  
12 Cheryl Leung<sup>5</sup>, Danielle Quittner<sup>6</sup>, Ryan J Hodges<sup>2,7</sup>, Daniel L Rolnik<sup>1,6</sup>  
13  
14  
15

- 16 1. Obstetrics and Gynaecology Registrar, Monash Health, Clayton, VIC, Australia
  - 17 2. Monash University, Clayton, VIC, Australia
  - 18 3. Consultant, Crinall Consulting, VIC, Australia
  - 19 4. The Ritchie Centre, Hudson Institute of Medical Research, Clayton, VIC, Australia
  - 20 5. Director of Training Obstetrics and Gynaecology, Monash Health, Clayton, VIC,  
21 Australia
  - 22 6. Obstetrics and Gynaecology Consultant, Monash Health, Clayton, VIC, Australia
  - 23 7. Program Director, Women's & Newborn, Monash Health, Clayton, VIC, Australia
- 24  
25  
26  
27  
28  
29  
30  
31  
32

33 **Abstract**

34 **Objectives** The impact of a coronavirus disease (COVID-19) specific professional  
35 development program on the wellbeing of obstetrics and gynaecology (O&G) doctors in  
36 training (DiT) working during the pandemic.  
37

38 **Design** A mixed-method evaluation of a single group pre-post test design study.  
39

40 **Setting** Melbourne, Australia between September 2020 and April 2021.  
41

42 **Participants** 55 O&G DiT working across four healthcare sites of a major tertiary hospital in  
43 Victoria, Australia, were included in the program.  
44

45 **Interventions** The delivery of a co-designed peer-to-peer (P2P) program, which identified and  
46 addressed the wellbeing goals of O&G DiT. Three interactive workshops were run alongside  
47 the implementation of a number of participant-led wellness initiatives.  
48

49 **Main outcome measures** Repeated measures analysis of World Health Organisation Wellbeing  
50 Index (WHO-5) and Copenhagen Burnout Innovatory (CBI) scores across three time points  
51 during the program. Multilevel generalised linear mixed effects models with random intercept  
52 were fit to the data, both in the entire population ("intention-to-treat") and restricted to those  
53 who attended the workshop ("per protocol" analysis). Participatory experiences and program  
54  
55  
56  
57  
58  
59  
60

learnings were captured using the Most Significant Change (MSC) technique, which included inductive thematic analysis.

**Results** We demonstrated an overall 31.9% improvement in wellbeing scores ( $p=0.006$ ). The MSC evaluation captured a shift in workplace culture as a result of the program, with improvement across the domains of connection, caring, communication, confidence and cooperation.

**Conclusions** We have successfully used a mixed-methods approach to contextualise a productive program to improve the wellbeing of COVID-19 frontline healthcare workers.

**Keywords** Mixed methods evaluation, coronavirus disease (COVID-19) pandemic, Zoom, wellbeing program, Pandemic Kindness Movement, doctors in training, obstetrics and gynaecology, junior medical officers, healthcare worker, most significant change technique.

### Article Summary

#### Strengths and limitation of this study

- Utilises a mixed-method evaluation, enhancing the interpretation of outcomes and adding valuable information about the impact, acceptability and utility of the intervention.
- Provides a detailed description of the peer-led and peer-to-peer participatory processes used to affect a co-design approach to program development.
- Use of the Most Significant Change methodology, a powerful qualitative evaluation tool which provokes broad reflections in participants and provides an avenue for organisational leadership to initiate improvements and build capacity.
- Limitations included sample size and generalisability; with a need to further validate the program via larger studies with the inclusion of other populations.

### Introduction

The novel coronavirus disease (COVID-19) pandemic has had an unparalleled impact on the provision of healthcare, resulting in significant physical and emotional burden on those accessing and servicing the acute hospital setting.[1,2] It has created further pressure on an already vulnerable group of doctors with additional risks from exposure to an infectious disease, reduced resources and high workload.[1,3]

Burnout is a recognised occupational hazard for healthcare workers and encompasses emotional exhaustion, withdrawal from patients and loss of job satisfaction.[4] Ensuring the health of workers is vital for the delivery of high quality service, with healthy workers

1  
2  
3  
4 demonstrated to provide better customer relations, have more positive attitudes, and be more  
5 enthusiastic.[3,5] In comparison to other professionals, doctors are ten times more likely to  
6 suffer from psychological distress, especially those under the age of thirty.[6,7] These findings  
7 are not isolated to the Australian medical workforce, with 69% of USA healthcare workers  
8 reporting workplace stress and 37% of UK doctors requiring additional care due to burnout.  
9 [4] More than a decade ago a national report highlighted the significant distress of Australian  
10 doctors in training (DiT) with less than 30% satisfied with their career, over half (54%) losing  
11 compassion for patients and more than two thirds (69%) experiencing burnout.[8] Obstetrics  
12 and Gynaecology (O&G) DiT work long hours and shift work, which are known to contribute  
13 to dissatisfaction and reduced wellbeing, as well as occupational stress, burnout and mental  
14 health issues.[3]

15  
16  
17  
18  
19  
20  
21  
22  
23  
24 Despite safety and quality healthcare indicators being drivers for accountability there is a  
25 failure to recognise the need to support the wellbeing of healthcare workers.[7] In recognition  
26 of the immediate risk to the wellbeing of the Women's Health DiT group and associated  
27 impacts on health service provision we aimed to provide an appropriately resourced, efficient  
28 and effective COVID-19 pandemic-specific professional development program focused on  
29 improving the wellbeing of O&G DiT. A program, aimed at informing the future  
30 development and implementation of similarly focussed wellbeing initiative was co-designed  
31 by the O&G DiT group and delivered via a peer-to-peer (P2P) teaching model. The aims were  
32 to:  
33  
34  
35  
36  
37  
38  
39

- 40 1. Assess the wellbeing and symptoms of burnout among the Monash Women's DiT in  
41 O&G.
- 42 2. Provide immediate and practical tools and strategies to enhance the wellbeing of  
43 Monash Women's DiT working during the COVID-19 pandemic.
- 44 3. Generate an evidence base, informed by qualitative and quantitative data, to advise  
45 future implementation.  
46  
47  
48  
49

50  
51  
52  
53  
54 Monash Women's, a major tertiary hospital in Victoria, Australia has been a leader in the  
55 implementation of COVID-19 strategic management plans, policies and procedures with the  
56 safety and wellbeing of staff, patients and the community at the forefront.[9]  
57  
58  
59  
60

1  
2  
3  
4 The aim, specific to the mixed methods analysis, was to evaluate and explore the impact of the  
5 covid-19 specific wellbeing program, as a whole, on the cohort of O&G DiT.  
6  
7

## 8 **Methods**

9  
10 Here we list the steps involved in the P2P program development, including the details of the  
11 co-design processes followed. The integration of a mixed-methods analysis is described, an  
12 approach which takes advantage of the considerable impact qualitative research methods can  
13 have on reviewing health interventions.[10] A quantitative evaluation was conducted of the  
14 World Health Organisation Wellbeing Index (WHO-5) and Copenhagen Burnout Inventory  
15 (CBI) measures that were administered prior to and at multiple time points following the  
16 program.[11,12] Qualitative analysis utilising the Most Significant Change (MSC) technique,  
17 is also described and the key outcomes listed.  
18  
19  
20  
21  
22  
23  
24

### 25 ***Patient and public involvement***

26  
27 All 55 Monash Women's doctors in training (DiT) working across four sites – one tertiary  
28 and three secondary hospitals (Monash Medical Centre, Dandenong District Hospital,  
29 Moorabbin Health and Casey Hospital) were invited to participate in the study. Our study  
30 utilised a convenience sample size without a formal power calculation. Recruitment was  
31 maximised via advertising utilising group email. An introduction and orientation session was  
32 held with opportunity to complete recruitment at this time, and reminder emails were sent to  
33 increase uptake. Recruitment at the beginning of the first workshop also took place. Inclusion  
34 criteria included being a current O&G DiT who were both available and willing to attend the  
35 workshops and complete the questionnaires.  
36  
37  
38  
39  
40  
41  
42  
43

### 44 ***The intervention***

45  
46 An overarching self-selected group of senior DiT, known as 'champions', initiated the project,  
47 formulated broad goals (Figure 1) and directed activities in line with those promoted by Beyond  
48 Blue 'Protecting your mental health and wellbeing as a healthcare worker'.[13(15)] Monash  
49 Women's executive leaders were also engaged to participate and act on organisational level  
50 solutions. A co-design process and peer to peer learning model were identified as essential to  
51 effective development and implementation of the proposed program. A multi-format toolkit  
52 was developed, incorporating workshops, activities, and resources.  
53  
54  
55  
56  
57  
58  
59  
60

1  
2  
3  
4 Seven online workshops, each of one-hour duration, were delivered by DiT to their peers  
5 during protected teaching time on 17 September 2020, 24 September 2020 and 5 November  
6 2020. This model was selected to maximise positive impacts and enable rapid implementation  
7 of change.[14(13)] It is also a familiar style of learning given its similarity to the traditional  
8 'journal club' style of medical education frequently used in the training of Australian medical  
9 doctors.

10  
11  
12  
13  
14  
15 Workshop topics were modelled on the 'Pyramid of needs', for health worker wellbeing  
16 (Figure 2), (based on Maslow's hierarchy of needs),[15(14)] and covered six topic areas: basic  
17 needs, safety, love and belonging, esteem, contribution and leadership. The seventh workshop  
18 was devoted to reviewing topics presented. Workshop content dissemination was maximised  
19 with recordings, webmail links and online communities. In keeping with the co-design  
20 approach, brainstorming sessions were included, and ideas generated were disseminated to the  
21 O&G DiT cohort via email and posters. Participant-led initiatives were also encouraged and  
22 developed during the workshops, and advocating for personal solutions was supported.

23  
24  
25  
26  
27  
28  
29  
30  
31 The first workshop addressed meeting basic needs and was led by a more senior DiT. The  
32 session provided space for participants to acknowledge the importance of hydration, nutrition,  
33 shelter and sleep. Facilitated break out groups worked together to share how they were being  
34 impacted by the COVID-19 pandemic and ideas on how improvements at both an individual  
35 and organisational level could be achieved. These ideas were central to informing the larger  
36 goals and actions of the program, including the development of the policy on dealing with  
37 doctors in distress.

38  
39  
40  
41  
42  
43  
44 Activities involved the provision of a drink 'hydration' station to encourage breaks,  
45 improvements to the doctor office space and social online sessions by Zoom Cloud Meetings  
46 (Zoom Video Communications, San Jose, CA, USA).

47  
48  
49  
50  
51 Resources included the creation and display of posters articulating the main workshop points  
52 and a team social media app. Further information on the program, including a workbook and  
53 templates can be found in resources: 'Monash Women's Leading Kindness COVID-19 Toolkit  
54 Pilot Project Most Significant Change Evaluation Report';[16] 'Monash Women's Leading  
55 Kindness COVID-19 Toolkit Pilot Project Quantitative Evaluation Report', and 'Start up: A  
56 Kindness COVID-19 Toolkit'. [17,18]  
57  
58  
59  
60



## *The evaluation strategy*

### *Quantitative analysis*

The CBI and WHO-5 questionnaires, both well-validated and standardised, were employed to evaluate the pre-existing wellbeing and symptoms of burnout in the cohort O&G DiT (September 2020, timepoint one).[12,15] Both were repeated at timepoint two (November 2020) and at timepoint three, six months following the completion of the workshop (April 2021). Questionnaires were delivered and secured electronically via the online data collection tool, Qualtrics (Qualtrics, Provo, UT, USA), with surveys labelled with an anonymous but memorable code, created by the participant, to preserve confidentiality.

The WHO-5 is a standardised questionnaire, which asks five questions focused on wellbeing in the preceding two-week time period (Appendix 1). A total score of less than 50 is considered to represent reduced wellbeing.[11] The CBI assesses the load of personal, work and patient related factors on burnout, with its benefits being a readily available and brief evaluation tool. A score of 25-50 indicates an intermediate level of burnout, and greater than 50 a high level of burnout.[19]

Statistical analyses were performed in Stata 16.1.(StataCorp. 2019. Stata Statistical Software: Release 16. College Station, TX: StataCorp LLC). To compare the CBI and WHO-5 scores after exposure to the program (timepoints two and three) with those before its implementation (timepoint one) accounting for the repeated measures design, multilevel generalised linear mixed effects models with random intercept were fit to the data, both in the entire population (“intention-to-treat”) and restricted to those who attended the workshops (“per protocol” analysis). In these models, the measurements timepoints were treated as fixed effects and participants were treated as random effects. The assumptions of linear additivity and homogeneity of the residuals were assessed by inspection of residual versus fitted plots. Effect estimates are reported as the mean difference with 95% confidence intervals, and p-values below 0.05 were considered statistically significant.

### *Qualitative analysis*

1  
2  
3  
4 Qualitative evaluation utilising the MSC technique was chosen to gain insight into participants'  
5 experience of the personal and professional impacts of the toolkit. Story gathering interviews  
6 took place via Zoom sessions between 8 December 2020 and 4 January 2021. (Appendix 2)  
7  
8 Nine stories of change were collected from interviews that lasted between 20 and 40 minutes.  
9  
10 To ensure rigour and impartiality external expertise in qualitative analysis was engaged. MSC  
11 was chosen because it seeks to learn about participants' perceptions of program impacts by  
12 evaluating their stories of significant change, and thereby complemented the program's  
13 participatory principles: co-design, peer leadership and P2P learning. MSC was also selected  
14 because of its focus on 'what works well and how to do more of what works'.<sup>[20]</sup>  
15  
16  
17  
18  
19

20 Consistent with the MSC technique, the evaluation incorporated three main steps:

- 21 1. Collection of Significant Change stories via interviews.
- 22 2. Selection of the Most Significant Change story by a stakeholder panel, and  
23 identification of key themes through manual inductive analysis of MSC stories and  
24 selection panel discussion.
- 25 3. Documenting and communication of the Most Significant Change story and key  
26 themes.  
27  
28  
29  
30  
31  
32

33  
34 The MSC technique involves a hierarchical selection process which narrows the data down to  
35 one story representing the most significant change. A stakeholder panel consisting of trainees  
36 and supervisors, as well as interview participants who were contributors of stories of change,  
37 undertook a two-tiered process culminating in the selection of one significant story from a  
38 total of nine stories (Figure 3). Prior to the selection panel the nine stories were randomly  
39 divided into three groups of three. Stories from each group were then read aloud in the panel  
40 session and were shortlisted via an open voting process. Individual reasons for selection were  
41 shared and recorded through open discussion and agreement was reached on one most  
42 significant change story.  
43  
44  
45  
46  
47  
48  
49

50 To gain a comprehensive picture of the range of significant changes experienced by participants  
51 a manual inductive analysis of all nine stories and the transcript of the selection panel session  
52 discussion was conducted to capture emergent themes. This methodology is discussed in  
53 detail in other publications.<sup>[16,21,22]</sup>  
54  
55  
56  
57

## 58 Results

### 59 *Program overview*

60

1  
2  
3  
4 The program, which was evaluated as a whole rather than the individual components, included;  
5 seven one hour live remote workshops (covering each of the six themes and one review  
6 session); circulated recordings of the workshops; three online social sessions; a hydration  
7 station stocked with drinks for each work site; six laminated wall posters with the main  
8 concepts from the workshops posted at each work site; a senior trainee education session on  
9 supporting junior trainees; a meeting with senior management advocating for wellbeing  
10 initiatives; a business proposal for a wellbeing officers; renovation of the doctor's office spaces  
11 and the development of a social media app.  
12  
13  
14  
15  
16  
17  
18  
19  
20  
21

### 22 ***Participants***

23 Forty-six (83.6%) DiT completed the initial WHO-5 and CBI at timepoint one. Seventeen  
24 DiTs, including residents and registrars, attended at least one of the live workshops, the  
25 recorded workshops were circulated to all 55 DiT however it is not known how many viewed  
26 them in their own time. All 55 DiT were exposed to the initiatives of the program, however  
27 specific details of their uptake are unknown. Following the completion of the workshops  
28 (timepoint two), 27 responses were collected, of which 59.3% (n=16) were workshop  
29 participants (live or recorded viewing). At timepoint three 11 responses were collected, with  
30 63.6% (n=7) being participants of the workshops.  
31  
32  
33  
34  
35  
36  
37  
38

### 39 ***Quantitative analysis: CBI and WHO-5***

#### 40 ***Copenhagen Burnout Inventory (Figure 4)***

41  
42 Among all DiT (those who participated in the workshop and those who did not), there was a  
43 mean reduction of 2.0 points (95% CI: -7.4 to 3.3) at timepoint two compared to timepoint one,  
44 although this reduction was not statistically significant ( $p = 0.454$ ). There was a mean reduction  
45 of 6.8 points (95% CI: -14.4 to 0.7) at timepoint three compared to timepoint one,  
46 demonstrating a trend towards statistical significance ( $p = 0.077$ ). Similarly, among those who  
47 participated in the workshop, there was a mean reduction of 0.3 points (95% CI: -6.8 to 6.2) at  
48 timepoint two compared to timepoint one, although this reduction was not statistically  
49 significant ( $p = 0.935$ ). There was a trend towards statistical significance ( $p = 0.086$ ) at  
50 timepoint three compared to timepoint one with a mean reduction of 8.2 points (95% CI range:  
51 -17.5 to 6.2).  
52  
53  
54  
55  
56  
57  
58  
59  
60

### *WHO wellbeing index (Figure 4)*

Among all participants there was a statistically significant mean increase of 10.5 points (95% CI: 3.3-17.7,  $p=0.006$ ) at timepoint two compared to timepoint one, and a statistically significant mean increase of 14.9 points (95% CI range: 0.5-29.3,  $p=0.006$ ) at timepoint three compared to timepoint one. Analysis restricted to those who participated in the workshop showed a mean increase of 9.2 points that trended towards statistical significance (95% CI: -0.2 to 18.5,  $p = 0.054$ ) at timepoint two compared to timepoint one, and a significantly higher WHO score at timepoint three, with a mean increase of 16.4 points (95% CI range: 3.2 to 29.7,  $p = 0.015$ ) at timepoint three compared to timepoint one.

### *Qualitative Analysis*

The complete methodology and outcomes of the qualitative analysis have been published elsewhere, below we list a summary of the findings.[16,17]

#### *The MSC story*

The selected story 'Team cohesiveness' (Appendix 3) was contributed by a junior O&G DiT workshop participant. It was chosen by the panel because it described how the COVID-19 toolkit brought about cultural change and fostered a sense of kinship by enabling basic needs to be met, "break[ing] down hierarchical barriers within the Monash Women's Health team" and building team cohesiveness multi-directionally.

*"With the introduction of the Wellbeing program there was a more organised sense of looking out for each other... A highlight was senior clinicians telling their own stories... Witnessing their fears and concerns, and their approaches to challenges makes you more impressed by their achievement, you feel like challenges are more approachable, the steps ahead are more attainable...The program was also an opportunity to address the things that make a cohesive team, that make us all better together."*

#### *Themes*

Significant changes linked to five interconnected themes (Figure 5) were woven throughout the nine stories and encapsulated in the most significant change story selected by the panel.

1  
2  
3  
4 Connection: Connections between DiT were strengthened through the P2P learning model of  
5 the workshop design, with one participant reflecting that “hearing others talk about their  
6 experiences and feelings of not being okay and sharing my experiences and feelings...made  
7 me feel more connected and less alone”. Another participant observed: “One of the most  
8 important things to come out of the program during the pandemic was being closer to  
9 colleagues that I don’t work with every day”.

10  
11  
12  
13  
14  
15 A participant story described a significant change for them as “a noticeable physical  
16 difference...the revamp of our doctors’ office, there is new furniture, and plants in there now,  
17 it is fresh and more open. We feel welcome; now I’ve somewhere that I belong at work”.

18  
19  
20  
21  
22 Communication played an important role in fortifying connections. The impact of the  
23 workshop session which explored ‘Esteem’ was recalled as motivating DiT to connect with  
24 one another by engaging in two-way feedback. An example of how this was enacted was  
25 explained by one participant as paying attention to asking others “about their shift, and how  
26 they felt they went, and...ask[ing] them for feedback on how they thought I had gone”.

27  
28  
29  
30  
31  
32 Caring: Caring emerged as a significant change. Participants recognised “a more organised  
33 sense of looking out for each other”. The workshop on meeting basic needs, in particular,  
34 shifted how DiT thought about self-care, as well as encouraging greater care for each other.  
35 Participants explained that “people were asking, ‘Have you had water this morning? Have you  
36 had enough to eat?’”. They also reflected “the program reminded us to take care of ourselves,  
37 and to support each other, even on long shifts when we are very stressed at work”.

38  
39  
40  
41  
42 Another observed: “Overall, the general culture at work has changed, everyone is more mindful  
43 of each other’s wellbeing.”

44  
45  
46  
47  
48  
49  
50  
51  
52  
53  
54  
55  
56  
57  
58  
59  
60  
Communication: The program offered alternative ways to share information and opened up  
communication vertically and horizontally. Investing in the revamping of the doctor’s office  
space was experienced as a powerful gesture by participants. The program was described as  
having created a “space to talk” allowing trainee doctors to “hear each other”.

Another participant explained, “The workshop on giving feedback; asking for feedback and  
how to give feedback in a constructive, rather than critical way, I took that on. I will definitely  
remember that in the future. The workshop normalised open conversation”. Others observed

1  
2  
3  
4 an increase in interactions with colleagues, More open communication facilitated supporting  
5 each other, “When I spoke about what I was going through, others then asked me for a coffee  
6 or a meal and shared their version of not being okay.”  
7  
8  
9

10 Confidence: All participants felt more confident as a result of experiencing the program. They  
11 were not only more confident about asking for help, they also felt empowered to be leaders and  
12 bring about change.  
13  
14

15  
16  
17 One DiT reflected that they had “learnt that courage is not the absence of fear – it is the ability  
18 to act in the presence of fear”. Another explained that for them the “most important change  
19 brought about by the wellbeing program...was recognising my agency. I learned there were  
20 changes I could make.” The peer-to-peer delivery was highlighted as a major contributor to  
21 program impact, with one participant observing “a highlight was senior clinicians telling their  
22 own stories. You can have grandiose ideas about others at work, especially the seniors you  
23 admire, how they know everything and do everything right. Witnessing their fears and  
24 concerns, and their approaches to challenges makes you more impressed by their achievement,  
25 you feel like challenges are more approachable, the steps ahead are more attainable”.  
26  
27  
28  
29  
30  
31  
32

33  
34 Cooperation: The program aimed to bring O&G DiT together; to reflect, learn and grow  
35 skills to improve wellbeing, and most importantly to have their concerns acknowledged and  
36 acted upon at an organisational level. Participants of the program observed a shift to more  
37 cooperative workplace practices, reporting that “the program was also an opportunity to  
38 address the things that make a cohesive team, that make us all better together. More than before  
39 the whole team stepped up to help each other make it through the day together.”  
40  
41  
42  
43  
44

## 45 Discussion

46  
47 *‘The difference that made a difference.’ [22]*  
48  
49

50 This study evaluated an educational program to improve wellbeing designed by and for a group  
51 of 55 O&G DiT at a major tertiary hospital in Victoria, Australia during the 2020 COVID-19  
52 pandemic. We tracked the indicators of wellbeing and burnout with collection of surveys before  
53 (n=46 and after (n=27 and 11) the implementation of seven workshops, which were one  
54 component of a collection of initiatives that comprised a toolkit of resources. Nine workshop  
55 participants were interviewed about their most significant experiences of change resulting from  
56  
57  
58  
59  
60

1  
2  
3  
4 the program. We demonstrated an overall 31.9% improvement in wellbeing scores. The  
5 qualitative evaluation identified the most significant change, ie. ‘the difference that made a  
6 difference’ as an overall positive shift in workplace culture associated with change across five  
7 domains: connection, caring, communication, confidence and cooperation.  
8  
9

10  
11  
12 The impact of COVID-19 on the safety and wellbeing of healthcare workers is well  
13 documented.[2,23,24,25] Ellis et al.[2] reported an increase in surgical error due to the  
14 combined effects of COVID-19 on doctors’ sleep hygiene, concerns regarding infection  
15 exposure and the burden of personal protective equipment restricting movement and  
16 communication. However, despite well-known risks to DiT and an urgent call for  
17 interventions,[6,26] there has been a lack of validated programs aimed at improving their  
18 wellbeing.[7,27]  
19  
20  
21  
22  
23  
24

25  
26 During the third month of the second Victorian COVID-19 pandemic lockdown, which lasted  
27 112 days from the 6<sup>th</sup> of July 2020 to the 26<sup>th</sup> of October 2020,[28] we observed that Monash  
28 Women’s DiT were experiencing significantly reduced wellbeing (mean score 46.7) and  
29 intermediate levels of burnout (mean score 48.1). Participants in the qualitative evaluation  
30 described finding themselves overwhelmed. For some, the pandemic exposed vulnerabilities  
31 more so than ever before. One participant shared that “the COVID-19 pandemic affected [their]  
32 life – personally and professionally – in every way.” In the workplace trainees reflected that  
33 there was “a lot of fear across staff, patients, administrators; everyone.” They shared their  
34 experiences of being both “extremely grateful to have work and...at the same time...a level of  
35 resentment about having to go to work, and being expected to see people and just absorb the  
36 daily changes in PPE protocols, wearing visors, face masks and glasses, at times feeling  
37 claustrophobic; like you couldn’t escape, not being able to eat or drink during a busy shift.”  
38  
39  
40  
41  
42  
43  
44  
45  
46

47  
48 DiT working in O&G are responsible for providing care across a range of clinical areas within  
49 the health service site, including the emergency department, outpatient clinics, inpatient wards,  
50 operating theatres, and birthing suites. In a recent survey obstetricians and gynaecologists were  
51 amongst the highest at risk of physician burnout.[29] Anticipating that the added workload  
52 generated by a pandemic situation would pose additional risk to the wellbeing of O&G DiT is  
53 not unwarranted, with Ochsmann et al.[30] identifying strain levels as directly related to  
54 overtime worked. The provision of safe care also depends on effective communication with  
55 patients, their families and across multidisciplinary teams spanning all levels of the  
56  
57  
58  
59  
60

1  
2  
3  
4 organisational structure. These multi-dimensional care and communication challenges have  
5 also been demonstrated to increase risk for emotional and physical fatigue.[31]  
6  
7

8  
9 The *'Monash Women's COVID-19 leading kindness toolkit'* program demonstrated a 31.9%  
10 improvement in the wellbeing index for all DiT participants, and contributed to  
11 safeguarding against worsening burnout symptoms. Those who attended a component of  
12 the integrated workshops experienced slightly greater impact (35.5%) on wellbeing over time.  
13 The overall achievement of the project, as expressed by participants in their stories of change,  
14 was a shift to a more caring and supportive workplace culture. Junior and senior DiT felt more  
15 connected as colleagues and were more confident about advocating for change and  
16 communicating with one another about their work. The impact of workplace friendships has  
17 been shown to be inversely related to workplace stress with healthcare workers relying most  
18 heavily on strong peer-support, sharing with senior staff and supportive social networks when  
19 facing a crisis.[3] The P2P style of our program was highlighted as a strength by participants.  
20 This is consistent with the finding of Chanchlani et al.[6] who evaluated a P2P mentoring  
21 program and demonstrated an improved sense of community and support. Similarly, Walton et  
22 al.[9] identified the important role of P2P interactions in the acquisition of complex non-  
23 technical skills.  
24  
25  
26  
27  
28  
29  
30  
31  
32  
33

34  
35 Based on our experience in this initiative, we strongly advocate for a mixed-methods approach  
36 in the evaluation of health care programs. Triangulating qualitative and quantitative methods  
37 enhances interpretation of outcomes, and provides valuable information about the impact,  
38 acceptability and utility of interventions.[12,31] This integrative approach utilises the  
39 complementary capacities of quantitative research in defining measurable variables and  
40 qualitative research in investigating complex social constructs.[12] Exploring reasons for  
41 participant satisfaction or dissatisfaction, lack of adherence and causes of conflicting outcomes  
42 in different population groups are examples of the way qualitative analysis can enhance  
43 quantitative findings.[32] Despite growing recognition of the value of mixed-method designs  
44 there remains a lack of published medical studies employing a dual-analysis approach.[12] This  
45 is supported by Lewin et al.[31] who conducted a review of the Cochrane register and  
46 identified just one third undertook a combined quantitative and qualitative analysis.  
47 Recognised barriers to mixed-method designs in medical research include the need for  
48 adequate resourcing, the time-consuming nature of the research process and difficulty  
49 accessing appropriately experienced qualitative researchers.[31]  
50  
51  
52  
53  
54  
55  
56  
57  
58  
59  
60



## Implications and limitations

The program was enthusiastically welcomed, and our findings attest to the benefits received by participants. The triangulation of quantitative and qualitative results demonstrates DiT were provided with tools to address burnout and improve wellbeing. Although our results suggest an improvement in burnout over time, this effect did not reach significance. Given the small numbers, our study may have been underpowered to detect a significant improvement in burnout. Alternatively, the program may have limited impact on improving burnout. However, given the entire cohort remained within the intermediate burnout category (score 25-50), our findings support the program's success in protecting against worsening burnout during the pandemic.

The results of this study are limited by the small sample size. Participation in the workshop component of the program was only 30.9% (n=17), despite the workshops being delivered during dedicated teaching time. This highlights the demands being placed on trainee doctors over this time and reflects the practice of clinical responsibilities taking priority over educational opportunities. The P2P and co-designed structuring of the program as a 'toolkit' enabled the workshop content and initiatives to reach the non-attending DiT, affecting a rapid execution of changes and success of the program.

We also self-imposed limitations on the collection of participant characteristics in order to preserve anonymity. A key component of the MSC technique is sharing personal stories. This presents challenges for maintaining confidentiality. The sample size and close working relationships meant maintaining anonymity could not be guaranteed. We addressed this by disaggregating stories, and by ensuring participants were informed that they may be identified.

Given the collection of data was dependent on the voluntary completion of interviews and surveys our analysis is subject to non-response bias. Raising the possibility that those who responded were more motivated and healthier, and people with more burnout or depression did not respond. Our small numbers limited the ability to undertake inverse probability weighting or multiple imputation to address this. The mixed-methods design strengthened the findings of the evaluation, providing insight and breadth to inform future implementations.

1  
2  
3  
4 Over the last few years, there has been a greater focus on the nurturing of emotional  
5 intelligence. Many of these efforts have involved self-directed learning, action coaching and  
6 formalised mentoring programs.[33] These attempts have faced substantial system-based  
7 obstacles and have, at times, paradoxically penalised the individual doctor for failing to self-  
8 care. Doctors in training are a highly goal motivated group, yet messages that a lack of  
9 resilience, weakness, and laziness typify those who succumb to these stressors is  
10 enduring.[3,7,33] The harm from erroneous messages sent through labelling doctors as super-  
11 humans is also well documented; often as a gesture of thanks this culture lends itself to  
12 messages of the need to 'tough it out'.[34] Together, these run the risk of adding to the  
13 misconception that seeking help is a sign of weakness, failure and not having what it takes to  
14 survive the rigors of medical training.  
15  
16  
17  
18  
19  
20  
21  
22

23  
24 In co-designing our program, we were able to create a system of resources, which were  
25 meaningful and useful. In combination with a solid commitment from the organisation to  
26 support and see through the delivery of the program, we effectively created a cultural shift and  
27 built capacity with a lasting impact for our team. The provision of programs with a directive to  
28 protect and prevent healthcare workers from burnout is desperately needed. Interventions must  
29 be directed and targeted, recognising time constraints, transient working locations and  
30 competing demands. Additionally, their evaluation is imperative.[7] It is vital that doctors feel  
31 safe to seek help, and more importantly administrators need to identify, track and monitor the  
32 wellbeing of employees and act well before crisis point is reached [35].  
33  
34  
35  
36  
37  
38  
39

40 We have successfully used a mixed-methods approach to contextualise a productive program  
41 to improve the wellbeing of COVID-19 frontline healthcare workers. We hope the evidence  
42 generated from our program contributes to informing the implementation of future programs  
43 within other healthcare groups and settings.  
44  
45  
46  
47  
48

## 49 **Figures**

50 Figure 1: Goals of the 'Monash Women's leading kindness COVID-19 toolkit'

51 Figure 2: Pyramid of Needs

52 Figure 3: MSC selection process

53 Figure 4: Repeated measures CBI and WHO-5 scores for all and restricted to those who  
54 participated in the 'Monash Women's leading kindness COVID-19 toolkit' workshops

55 Figure 5: Themes revealed by stories which came together to shift the workplace culture  
56  
57  
58  
59  
60

## Appendices

Appendix 1: Participant Questionnaire

Appendix 2: Most Significant Change (MSC) Story Guidelines

Appendix 3: Participant Stories of 'Most Significant Change'

### a. Contributorship

MW, RM, JA and DR contributed to the study design and implementation. Quantitative data was collected by JA, RM and MW, and analysed by DR, RM and MW. Qualitative data collection and analysis was conducted by KC and WC. MW oversaw the compilation of the first draft of the manuscript. CL and DQ contributed to the program design and development. RH acted as a senior supervisor and led program resources allocation. All listed authors contributed to the manuscript and meet authorship criteria, without the exclusion of others.

### b. Funding Statement

The '*Monash Women's leading kindness COVID-19 toolkit*' wellbeing program and its evaluation was funded by Monash Health Foundation grant (no award/grant number). The program and analysis were undertaken independently and without influence from the funding body.

### c. Competing of Interests

"All authors have completed the Unified Competing Interest form (available on request from the corresponding author) and declare: support from Monash Health Foundation COVID-19 Research grant for the submitted work; no financial relationships with any organisations that might have an interest in the submitted work in the previous three years, no other relationships or activities that could appear to have influenced the submitted work." (BMJ Author Guidelines, 2021)

### d. Ethics approval

The project was funded by the Monash Health Foundation and granted ethics approval from Monash Health Human Research Ethics Committee (QA/68545/MonH-2020-230841(v2)). Within the manuscript all details of the study are accurately and transparently provided in an honest account of the study.

#### e. Data sharing

We commit to undertaking all reasonable requests to share relevant data. De-identified raw data is securely stored within Qualtrics and with the research team. Open access evaluation reports are available at: <https://leadingkindnesscovid19toolkit.wordpress.com/>

#### Acknowledgments

The Pandemic Kindness Movement was a vital resource for inspiration and implementation of the program. We would like to thank the A/Prof Jane Munro along with all the clinicians and experts who contributed and curated this wonderful collection of information in such a user friendly and available format.

We would like to acknowledge the overarching guidance provided by A/Prof Jacqueline Boyle and A/Prof Arunaz Kumar who were instrumental in the planning of the project and evaluation processes.

We would also like to extend our gratitude to Prof Beverly Vollenhoven, Dr Mark Tarrant, Dr Risha Bhatia and A/Prof Arunaz whose participation and feedback were crucial to the success of the evaluation.

We would also like to thank the Monash Women's O&G DiT who co-designed this pilot project along-side us. Especially to those who took the time to participate, present and provided vital feedback during a time in which they were most under the pump. Without your efforts there would be no program to report on.

#### Licence agreement

“The Corresponding Author has the right to grant on behalf of all authors and does grant on behalf of all authors, a worldwide licence to the Publishers and its licensees in perpetuity, in all forms, formats and media (whether known now or created in the future), to i) publish, reproduce, distribute, display and store the Contribution, ii) translate the Contribution into other languages, create adaptations, reprints, include within collections and create summaries, extracts and/or, abstracts of the Contribution, iii) create any other derivative work(s) based on the Contribution, iv) to exploit all subsidiary rights in the Contribution, v) the inclusion of electronic links from the Contribution to third party material where-ever it may be located; and, vi) licence any third party to do any or all of the above.” (BMJ Author Guidelines, 2021)

## References

1. Bridson TL, Jenkins K, Allen KG, McDermott BM. PPE for your mind: a peer support initiative for health care workers. *Med. J. Aust.* 2020 Dec 8.
2. Ellis R, Hay-David AG, Brennan PA. Operating during the COVID-19 pandemic: How to reduce medical error. *British Journal of Oral and Maxillofacial Surgery.* 2020 Jun 1;58(5):577-80.
3. Selamu M, Thornicroft G, Fekadu A, Hanlon C. Conceptualisation of job-related wellbeing, stress and burnout among healthcare workers in rural Ethiopia: a qualitative study. *BMC health services research.* 2017 Dec;17(1):1-1.
4. Strauss C, Gu J, Pitman N, Chapman C, Kuyken W, Whittington A. Evaluation of mindfulness-based cognitive therapy for life and a cognitive behavioural therapy stress-management workshop to improve healthcare staff stress: study protocol for two randomised controlled trials. *Trials.* 2018 Dec;19(1):1-0.
5. Pescud M, Teal R, Shilton T, Slevin T, Ledger M, Waterworth P, Rosenberg M. Employers' views on the promotion of workplace health and wellbeing: a qualitative study. *BMC public health.* 2015 Dec;15(1):1-0.
6. Chanchlani S, Chang D, Ong JS, Anwar A. The value of peer mentoring for the psychosocial wellbeing of junior doctors: a randomised controlled study. *Medical Journal of Australia.* 2018 Nov;209(9):401-5.
7. Forbes M, Byrom L, van der Steenstraten I, Markwell A, Bretherton H, Kay M. Resilience on the Run: an evaluation of a well-being programme for medical interns. *Internal medicine journal.* 2020 Jan;50(1):92-9.
8. Markwell AL, Wainer Z. The health and wellbeing of junior doctors: insights from a national survey. *Medical Journal of Australia.* 2009 Oct;191(8):441-4.
9. Palmer KR, Tanner M, Davies-Tuck M, Rindt A, Papacostas K, Giles ML, Brown K, Diamandis H, Fradkin R, Stewart AE, Rolnik DL. Widespread implementation of a low-cost telehealth service in the delivery of antenatal care during the COVID-19 pandemic: an interrupted time-series analysis. *The Lancet.* 2021 Jul 3;398(10294):41-52.
10. Russell J, Berney L, Stansfeld S, Lanz D, Kerry S, Chandola T, Bhui K. The role of qualitative research in adding value to a randomised controlled trial: lessons from a pilot study of a guided e-learning intervention for managers to improve employee wellbeing and reduce sickness absence. *Trials.* 2016 Dec;17(1):1-1.

11. Topp CW, Østergaard SD, Søndergaard S, Bech P. The WHO-5 Well-Being Index: a systematic review of the literature. *Psychotherapy and psychosomatics*. 2015;84(3):167-76.
12. Kristensen TS, Borritz M, Villadsen E, Christensen KB. The Copenhagen Burnout Inventory: A new tool for the assessment of burnout. *Work & Stress*. 2005 Jul 1;19(3):192-207.
13. Maslow AH. Preface to motivation theory. *Psychosomatic medicine*. 1943.
14. Beyond Blue. (2020). Protecting your mental health and wellbeing as a healthcare worker. <https://coronavirus.beyondblue.org.au/impacts-on-my-work/essential-services/protecting-your-mental-health-and-wellbeing-healthcare-worker.html>. Accessed 13 August, 2021
15. Ning L, Weavell W, Woodhouse W. *Mental Health Experience Co-Design: A Quality Improvement Initiative*. Melbourne, Australia: Tandem Carers. 2010.
16. Crinall K, Ward M, McDonald R, Crinall W, Aridas J, Rolnik DL. Evaluating a peer-led wellbeing programme for doctors-in-training during the COVID-19 pandemic in Victoria, Australia, using the Most Significant Change technique. *Evaluation Journal of Australasia*. 2022 Mar 28
17. Ward M, McDonald R, Aridas J, Rolnik DL. Monash Women's Leading Kindness COVID-19 Toolkit Pilot Project Quantitative Evaluation Report. 2021. Available at: <https://leadingkindnesscovid19toolkit.wordpress.com/>
18. Ward M, McDonald R, Aridas J, Rolnik DL. Start Up: Leading Kindness COVID-19 Toolkit. 2021. Available at: <https://leadingkindnesscovid19toolkit.wordpress.com/>
19. Thrush CR, Guise JB, Gathright MM, Messias E, Flynn V, Belknap T, Thapa PB, Williams DK, Nada EM, Clardy JA. A one-year institutional view of resident physician burnout. *Academic Psychiatry*. 2019 Aug;43(4):361-8.
20. Dart J & Davies R. A Dialogical, Story-Based Evaluation Tool: The Most Significant Change Technique. *American Journal of Evaluation*. 2003. 24(2):137-155.
21. Crinall K, Ward M, McDonald R, Crinall W, Aridas J, Quittner D, Leung C, Hodges R, Rolnik DL. Evaluating a peer-led wellbeing program for doctors-in-training during the COVID-19 pandemic in Victoria, Australia using the Most Significant Change technique. 2021. Under review
22. Davies, R., & Dart, J. (2005). *The 'Most Significant Change' (MSC) Technique, A guide to its Use*.

- 1  
2  
3  
4 [https://www.researchgate.net/publication/275409002\\_The\\_'Most\\_Significant\\_Change'](https://www.researchgate.net/publication/275409002_The_'Most_Significant_Change'_MSC_Technique_A_Guide_to_Its_Use)  
5 [\\_MSC\\_Technique\\_A\\_Guide\\_to\\_Its\\_Use](https://www.researchgate.net/publication/275409002_The_'Most_Significant_Change'_MSC_Technique_A_Guide_to_Its_Use) (accessed 26 Feb 2021)  
6  
7 23. Olagunju AT, Bioku AA, Olagunju TO, Sarimiye FO, Onwuameze OE, Halbreich U.  
8 Psychological distress and sleep problems in healthcare workers in a developing  
9 context during COVID-19 pandemic: Implications for workplace wellbeing. *Progress*  
10 *in Neuro-Psychopharmacology and Biological Psychiatry*. 2021 Aug 30;110:110292.  
11  
12 24. Rahman MA, Hoque N, Alif SM, Salehin M, Islam SM, Banik B, Sharif A, Nazim  
13 NB, Sultana F, Cross W. Factors associated with psychological distress, fear and  
14 coping strategies during the COVID-19 pandemic in Australia. *Globalization and*  
15 *Health*. 2020 Dec;16(1):1-5.  
16  
17 25. Shreffler J, Petrey J, Huecker M. The impact of COVID-19 on healthcare worker  
18 wellness: A scoping review. *Western Journal of Emergency Medicine*. 2020  
19 Sep;21(5):1059.  
20  
21 26. Australian Government National Mental Health Commission. National Mental Health  
22 and Wellbeing Pandemic Response Plan.  
23 [https://www.mentalhealthcommission.gov.au/mental-health-and-wellbeing-pandemic-](https://www.mentalhealthcommission.gov.au/mental-health-and-wellbeing-pandemic-response-plan)  
24 [response-plan](https://www.mentalhealthcommission.gov.au/mental-health-and-wellbeing-pandemic-response-plan). Accessed: 08 July 2021  
25  
26 27. Heath C, Sommerfield A, von Ungern-Sternberg BS. Resilience strategies to manage  
27 psychological distress among healthcare workers during the COVID-19 pandemic: a  
28 narrative review. *Anaesthesia*. 2020 Oct;75(10):1364-71.  
29  
30 28. Lupton D. Timeline of COVID-19 in Australia: the first year.  
31 <https://deborahalupton.medium.com/timeline-of-covid-19-in-australia-1f7df6ca5f23>  
32 Accessed: 12 July 2021  
33  
34 29. Kane L. 'Death by 1000 Cuts': Medscape National Physician Burnout & Suicide  
35 Report 2021 [https://www.medscape.com/slideshow/2021-lifestyle-burnout-](https://www.medscape.com/slideshow/2021-lifestyle-burnout-6013456#1)  
36 [6013456#1](https://www.medscape.com/slideshow/2021-lifestyle-burnout-6013456#1). Accessed 19 July, 2021  
37  
38 30. Ochsmann E, Lang J, Drexler H, Schmid K. Stress and recovery in junior doctors.  
39 *Postgraduate medical journal*. 2011 Sep 1;87(1031):579-84.  
40  
41 31. Killian KD. Helping till it hurts? A multimethod study of compassion fatigue,  
42 burnout, and self-care in clinicians working with trauma survivors. *Traumatology*.  
43 2008 Jun;14(2):32-44.  
44  
45 32. Lewin S, Glenton C, Oxman AD. Use of qualitative methods alongside randomised  
46 controlled trials of complex healthcare interventions: methodological study. *Bmj*.  
47 2009 Sep 10;339.  
48  
49  
50  
51  
52  
53  
54  
55  
56  
57  
58  
59  
60

- 1  
2  
3  
4 33. Walton M, Harrison R, Burgess A, Foster K. Workplace training for senior trainees: a  
5 systematic review and narrative synthesis of current approaches to promote patient  
6 safety. *Postgraduate medical journal*. 2015 Oct 1;91(1080):579-87.  
7  
8  
9 34. Scheele F, Novak Z, Vetter K, Caccia N, Goverde A. Obstetrics and gynaecology  
10 training in Europe needs a next step. *European Journal of Obstetrics & Gynecology*  
11 *and Reproductive Biology*. 2014 Sep 1;180:130-2.  
12  
13  
14 35. Blake T, Whallett A. Leadership and the medical registrar: how can organisations  
15 support these unsung heroes?. *Postgraduate medical journal*. 2016 Dec  
16 1;92(1094):735-40.  
17  
18  
19  
20  
21  
22  
23  
24  
25  
26  
27  
28  
29  
30  
31  
32  
33  
34  
35  
36  
37  
38  
39  
40  
41  
42  
43  
44  
45  
46  
47  
48  
49  
50  
51  
52  
53  
54  
55  
56  
57  
58  
59  
60



**Goal 1**

Getting enough rest during work hours and between shifts

- To support the existing structures to ensure work hours are safe; to foster flexibility; to role-model work-life balance; to monitor workloads and provide support for O&G DiT who are struggling

**Goal 2**

Eating healthy foods and engaging in physical activity

- To use environment and people-centred approaches to encourage and support O&G DiT to access healthy food options; to improve hydration in the workplace. To build opportunities to be active at work and home.

**Goal 3**

Being aware of where you can access mental health support at work

- To ensure the O&G DiT understands the risk to wellbeing during COVID-19, how to access additional services, and what roles they can play in helping each other stay well

**Goal 4**

Keeping in contact with colleagues, family and friends

- To foster a culture of care and support for the O&G DiT. To provide opportunities for connection and community

**Goal 5**

Advocating for management to create mentally healthy work structures

- To advocate for organisational prioritisation of wellbeing. To support the growth and development of the O&G DiT team

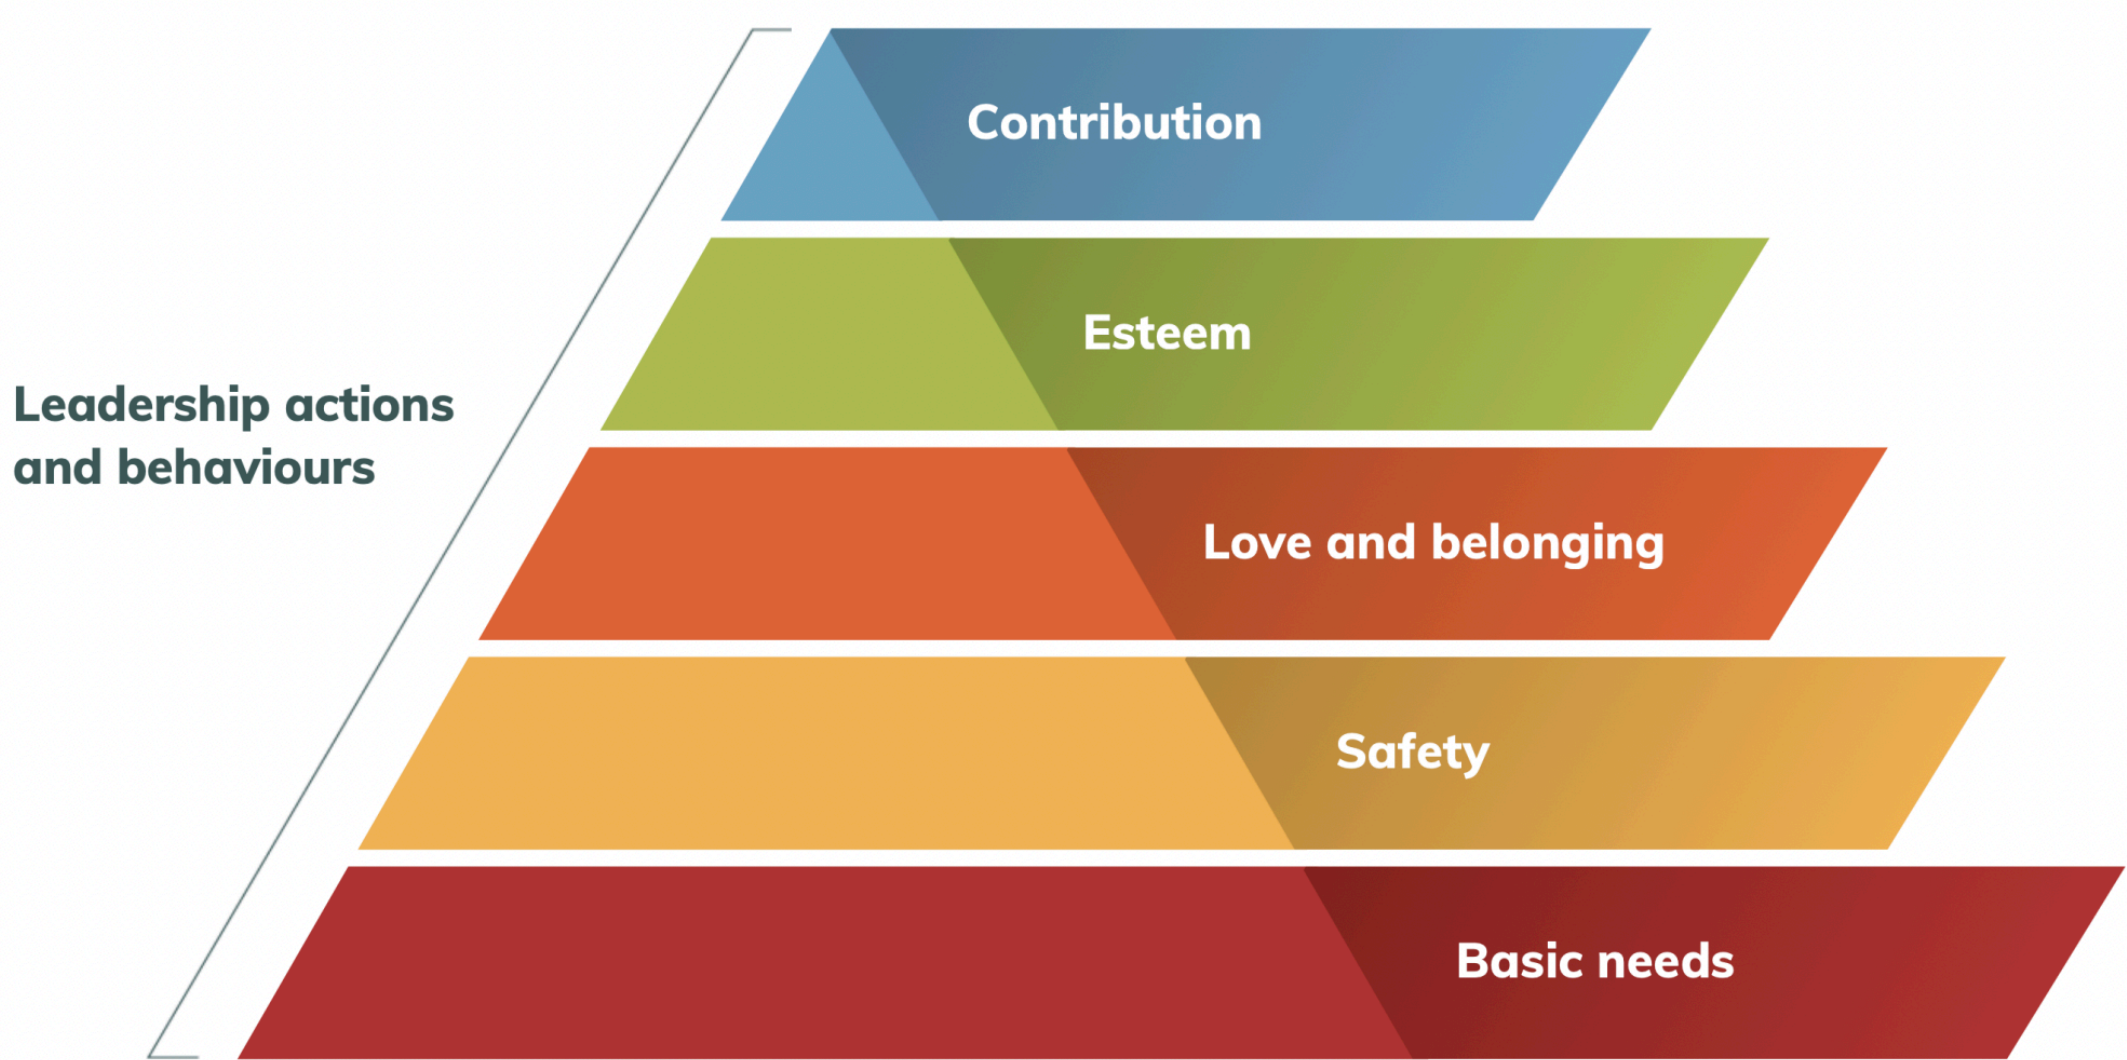

36  
37  
38  
39  
40  
41  
42  
43  
44  
45  
46

Connecting health workers and communities

# PYRAMID OF NEEDS

1  
2  
3  
4  
5  
6  
7  
8  
9  
10  
11  
12  
13  
14  
15  
16  
17  
18  
19  
20  
21  
22  
23  
24  
25  
26  
27  
28  
29  
30  
31  
32  
33  
34  
35  
36  
37  
38  
39  
40  
41  
42  
43  
44  
45  
46

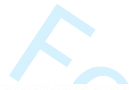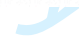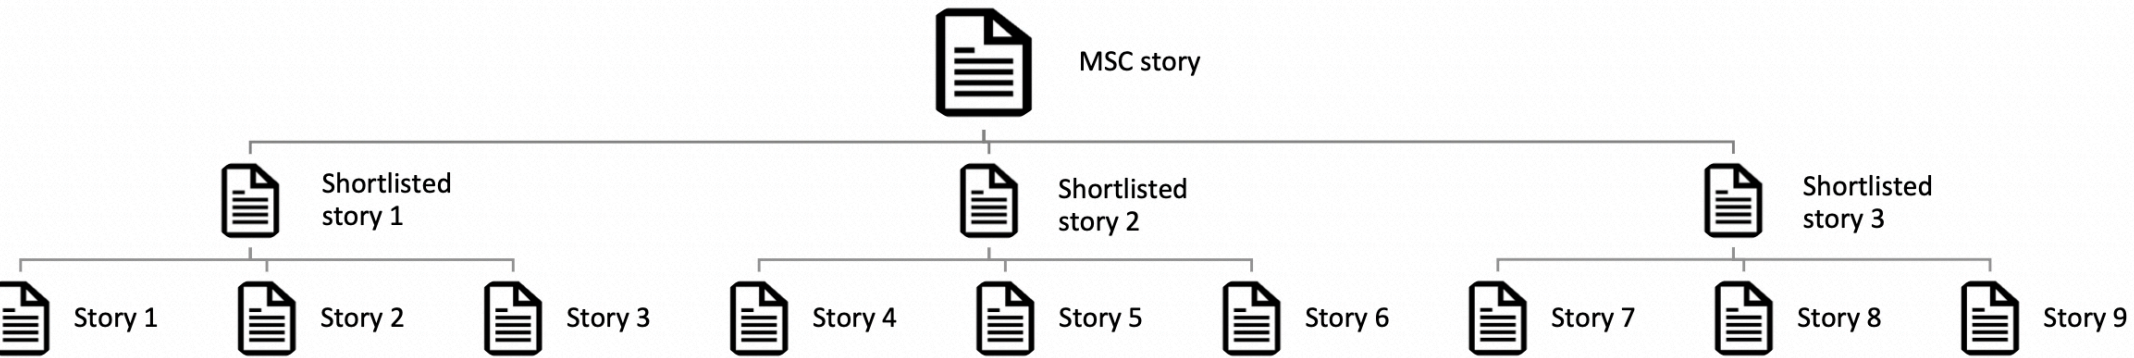

1  
2  
3  
4  
5  
6  
7  
8  
9  
10  
11  
12  
13  
14  
15  
16  
17  
18  
19  
20  
21  
22  
23  
24  
25  
26  
27  
28  
29  
30  
31  
32  
33  
34  
35  
36  
37  
38  
39  
40  
41  
42  
43  
44  
45  
46  
47

### CBI

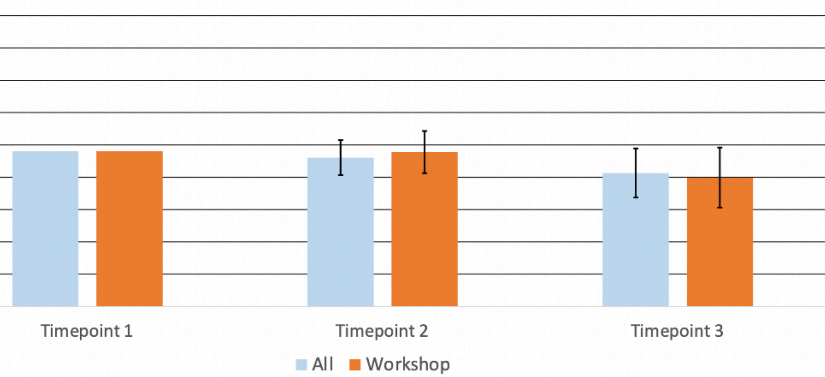

### WHO-5

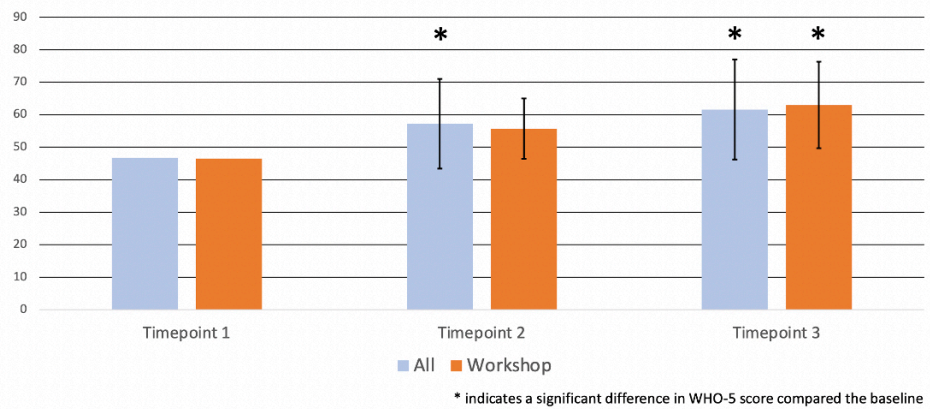

1  
2  
3  
4  
5  
6  
7  
8  
9  
10  
11  
12  
13  
14  
15  
16  
17  
18  
19  
20  
21  
22  
23  
24  
25  
26  
27  
28  
29  
30  
31  
32  
33  
34  
35  
36  
37  
38  
39  
40  
41  
42  
43  
44  
45  
46

Senior trainee doctors sharing vulnerabilities with junior trainees

Teamwork—helping each other

Workspace revamp—creating an organised, welcoming office space

Knowing where to get help if needed

**Connection**

Meeting basic needs—caring for self and each other

Link between caring for self and improved patient care

**Caring**

Flattening of hierarchy across levels

Giving and receiving feedback

Normalising open communication

Increased interactions with colleagues

**Communication**

In leadership capacity

In teams

In ability to look after basic needs

**Confidence**

Co-design

Peer leadership

Peer to peer learning

Working together

**Cooperation**

**CULTURAL CHANGE**

For peer review only - <http://bmjopen.bmj.com/site/about/guidelines.xhtml>

## Appendix 1

### PARTICIPANT QUESTIONNAIRE

#### Copenhagen Burnout Inventory & World Health Organisation Well-being Index (WHO-5)

##### CBI Part one: Personal burnout

*Always, often, sometimes, seldom, never/almost never*

1. How often do you feel tired?
2. How often are you physically exhausted?
3. How often are you emotionally exhausted?
4. How often do you think: "I can't take it anymore"?
5. How often do you feel worn out?
6. How often do you feel weak and susceptible to illness?

##### CBI Part two: Work-related burnout

*To a very high degree, to a high degree, somewhat, to a low degree, to a very low degree*

1. Is your work emotionally exhausting?
2. Do you feel burnt out because of your work?
3. Does your work frustrate you?
4. So you feel worn out at the end of the working day?
5. Are you exhausted in the morning at the thought of another day at work?
6. Do you feel that every working hour is tiring for you?
7. Do you have enough energy for family and friends during leisure time?

##### CBI Part three: Patient-related burnout

*Always, often, sometimes, seldom, never/almost never*

1. Do you find it hard to work with patients?
2. Do you find it frustrating to work with patients?
3. Does it drain your energy to work with patients?
4. Do you feel that you give more than you get back when you work with patients?
5. Are you tired of working with patients?
6. Do you sometimes wonder how long you will be able to continue working with patients?

##### WHO-5

*All of the time, most of the time, more than half of the time, less than half of the time, some of the time, no time*

1. I have felt cheerful and in good spirits
2. I have felt calm and relaxed
3. I have felt active and vigorous
4. I woke up feeling fresh and rested
5. My daily life has been filled with things that interest me

## Appendix 2

### Most Significant Change (MSC) Story Guidelines

The MSC method involves three main steps:

1. Collection of Significant Change stories from project participants.
2. Selection of Most Significant Change story, and identification of key themes.
3. Documenting and communicating the Most Significant Change stories in a report so that the program can be improved, and so others may learn about the program and its effects.

You can write or communicate your story in any way you like. The questions are provided as prompts to help frame your story; you can write as much or as little as you want for each point.

- How has COVID-19 pandemic affected your life: Personally and Professionally?
- How were you feeling before the program began?
- Which aspects of the [insert organisation] program did you make use of/experience/participate in?
- Did anything in your life change, either professionally or personally as a result of the 'Leading Kindness COVID-19 Toolkit' wellbeing program?
  - o YES/NO If your answer is NO, please tell us why you think this was the case.
  - o If YES, what changed? (How are things different now?)
- Why do you think these changes happened?
  - o When did the change/s happen?
  - o How did the change/s to happen?
- What was the most important change for you? And Why was this change so important for you?
- Did you have any 'AHA' moments as a result of the 'Leading Kindness COVID-19 Toolkit' wellbeing program? What were they?
- Is there anything else you would like to tell us about your experience of the 'Leading Kindness COVID-19 Toolkit' wellbeing program?
- Is there anything you would like to suggest about further development of the 'Leading Kindness COVID-19 Toolkit' wellbeing program?

## Appendix 3

### PARTICIPANT STORIES OF 'MOST SIGNIFICANT CHANGE'

As published in 'Crinall, K and Crinall, W (2021), *Monash Women's Leading Kindness COVID-19 Toolkit Pilot Project Most Significant Change Technique Evaluation Report*, Crinall Consulting, Melbourne, Australia.'

Available at: <https://leadingkindnesscovid19toolkit.wordpress.com/>

#### **Team cohesiveness\***

With the introduction of the Wellbeing program there was a more organized sense of looking out for each other. I really liked the basic needs workshop, which highlighted the simple things everyone needs to attend to—that you can help other people attend to—which are not always our first priority, like eating, drinking water and getting enough sleep. After the workshop people were asking “Have you had water this morning? Have you had something to eat?” There was recognition that it was not weak or lazy to take a break to drink and eat, you have to do it to function. Everyone went to medical school, it's not like we don't know that.

The other thing that I liked about the program, and in the aftermath, was how it seemed to break down hierarchical barriers within the Monash Women's Health team. A highlight was senior clinicians telling their own stories. You can have grandiose ideas about others at work, especially the seniors you admire, how they know everything and do everything right.

Witnessing their fears and concerns, and their approaches to challenges makes you more impressed by their achievement, you feel like challenges are more approachable, the steps ahead are more attainable. Not that you're any closer clinically, in the skill level, but you feel like a kind of kinship has opened up in a different way.

The program was also an opportunity to address the things that make a cohesive team, that make us all better together. More than before, the whole team stepped up to help each other make it through the day together. For example, if someone on referrals was inundated, you might take their pager or their phone, and say “You deal with the ones you've got, and I'll deal with the next two that come in”. Or maybe three people arrive on the ward to be admitted, and someone says, “Okay, you're on admissions, you do two of them, but I'll do one, I've got 10 minutes, I can do that.” If someone helps you out, you end up doing the same for someone else. I saw this happening.

A program like this identifies that people want to do something practical to support each other, to build cohesiveness within the team. I think that was one of the best things about it.

\*Most Significant Story



### **Recognising my agency**

The most important change brought about by the wellbeing program for me was recognising my agency. I learned there were changes I could make in my workplace environment and my headspace that could improve my wellbeing and the wellbeing of those around me. I was already primed for this change. I had completed exams and was thinking about ways that I could be better at my job, and a better leader and how I could contribute to the unit.

Although these changes were dynamic, they happened slowly, like with anything.

Even though I knew it in theory, seeing other people, after the workshops discussing how to give feedback and how to do a good 'power pose' reminded me that we all feel inadequate to the task at hand, and we can all learn to take care of ourselves and others better.

Watching people learn to advocate for themselves around meal breaks, for example made me realise how much there is in these really simple skills. I started noticing people's efforts to communicate, beyond the words they were saying. I hope this means I can respond to people's intended message more explicitly.

Getting doctors to do these sorts of things is really hard. But this experience has taught me that there is a need to learn soft skills, so that we build a workforce which communicates effectively and cares for itself.

Until we sit down and spend time discussing basic things, like meeting our needs, such as taking breaks, we won't develop the necessary skills; people need training in these things.

### **Taking care of ourselves and supporting each other better**

The Wellbeing workshops were a good way to interact online with my colleagues, and to have a chat and share. The wellbeing program helped people to connect. Other changes from the program included encouraging us to maintain our break time; reminding ourselves to drink water, and asking someone to take a break when they have a long shift. For example, we might tell each other that we have to take a break, that we have to go for a lunch break, or go for a water break. We take turns to remind each other: “You have to go, and you should go”.

A main difference for me, is that the program reminded us to take care of ourselves, and to support each other, even on long shifts when we are very stressed at work.

After the program I did look after myself better, and I know where I can get support if I need it. My relationship with colleagues changed because of the program – I had many more interactions. We got to know each other better, and now we support each other better. We have also learnt how to cope with all the things related to isolation.

### **Role modelling**

One of the really positive things about the Wellbeing workshops was that they were led by some of our more senior colleagues. We had time set aside from clinical work where we could just be a group, as opposed to trying to find the time at the end of a long shift or at lunchtime when you still have a pager or a phone. The placing of the workshops into our protected teaching time was really important.

The biggest thing I took from the wellbeing program was the role modelling; senior junior doctors taking ownership and then creating this space where all their colleagues could contribute.

The wellbeing workshops didn't provide me with new knowledge as such, but they made it okay to apply the information that was delivered. They reinforced that my colleagues felt the same way I do when they are overwhelmed or vulnerable. After doing some of the workshops I felt I had more permission to be vulnerable, to ask for help and to say when it wasn't great.

### More positive culture at work

When the Wellbeing program began people at work were starting to get tired. The workshops came at a really good time. Since the Wellbeing program there has been a noticeable difference at work. I have been more aware of reminding everyone, as well as myself, to drink water. Everyone has been more mindful of making sure people have time to go and get a drink, or some food and rest.

The workshop about giving feedback; asking for feedback and how to give feedback in a constructive, rather than critical way, I took that on. I will definitely be remembering that in the future. The workshop normalised open conversation, now it isn't something out of the blue that one individual has decided to do, it is something we are all aware of.

There's also a noticeable physical difference. An example is the revamp of our doctor's office, there is new furniture, and plants in there now, it is fresh and more open. We feel welcome; now I've somewhere that I belong at work, somewhere to put my things. And I feel less stressed when I go in that room because it isn't cluttered anymore.

Overall, the general culture at work has changed in a positive way, everyone is more mindful of each other's wellbeing. We feel more comfortable to check in with each other. Previously I'd thought about checking in with someone, but I wasn't sure if it was appropriate, but doing the workshops made me feel it is okay to reach out. Someone checked in on me when they felt I was overwhelmed. They sent a message saying "You sounded a bit down on the phone, is everything okay? You can call me anytime."

I think the positive culture change is the most important.

### **Courage to be part of the solution**

A number of things changed for me as a result of my involvement in the Wellbeing program, my health needs are now a priority, my connection with peers has strengthened, and my courage. I never thought of myself as a brave person: I was the kid who went to theme parks and didn't go on any rides. I thought confidence meant lack of fear; but I have learnt that courage is not the absence of fear—it is the ability to act in the presence of fear. I know now that I am courageous! I also realised if I want the system to change, I need to be part of the solution, and that I can listen, support and help my colleagues.

Being a peer-leader has been a wonderful and valuable experience. I feel I have gained relevant skills and knowledge, while considering the needs of my junior colleagues— whose position I was in only a few years ago. Being involved in a co-designed, peer-led program meant it was not just about attending a two-hour session and then leaving. I have engaged with the resources and followed many threads that I wouldn't have otherwise. At times the responsibility felt a little much, but the support of the team and the overarching belief of senior medical staff in the program was imperative.

### **Feeling more connected and less alone**

The most meaningful aspects of the wellbeing program for me were: the open admission that people were struggling in their own way, acknowledgement that we were all burnt out, tired and angry in some way about some little thing at work, and being able to talk about it. The space created to talk allowed us to hear each other talk about the challenges we were facing; it was okay to admit you were not feeling okay. Some of the people I most look up to, who I thought were perfectly resilient and not phased, shared their struggles and that helped me to feel okay about myself. Also, when I spoke about what I was going through, others then asked me for a coffee, or a meal and shared their version of not being okay. For me the biggest changes, and the greatest outcomes of the wellbeing program were hearing others talk about their experiences and feelings of not being okay, and sharing my experience and feelings. That made me feel more connected and less alone.

### **Taking breaks, debriefing and being closer to colleagues**

The wellbeing program began in the depth of the COVID-19 lockdown.

I used to be quite sceptical about wellbeing programs, but I was at a stage where I thought, 'anything will help'. So, I went to the sessions and tried to take on the advice. The first thing that was really helpful was feeling there was a bit more community; getting to know the people I work with a little more, knowing that they are there, and everyone is in a similar situation, and that my colleagues understand.

There were drinks sent to our staff room, which was amazing. When I forgot my lunch, or it was a busy day and there wasn't time to eat, I was able to drink these 'relatively' nutritious drinks. It was really good.

I made most use of the advice that it's okay to take breaks, that if I take a break my colleagues wouldn't think I was slacking off. Just allowing myself that rest. Colleagues would take my pager, that was really helpful because then I could actually rest, rather than worrying about the pager going off.

I also liked the session on debriefing; learning how and feeling comfortable to debrief with colleagues was very useful. The program provided creative ways to debrief and encouraged people to do it, even when you can't meet face-to-face.

One of the most important things to come out of the program during the pandemic was being closer to colleagues that I don't work with every day, knowing that they are there, and when the pandemic is over we can be together as a group.

I think the combination of all of those things together resulted in the most change for me.

### **More open lines of communication and learning from each other**

A key aspect of the design of the Wellbeing program was that it was peer-led and delivered, this meant the workshop content was relevant for participants, because we were all going through the same event and we could relate to each others' experience. We could share strategies. The program opened up lines of communication across different levels. People felt more comfortable asking for help. It felt like they could come to you and you could go to them. Support networks improved immensely.

The program allowed me, and hopefully my colleagues to make sure we focussed on ourselves as well as other people, so that we could do our job better.

The program also provided me with extra skills in giving and receiving feedback. I made a conscious effort to make sure the members of the team I was working with all left at the same time. It is a long walk to the carpark, and I made use of that time for informal chats and feedback with my colleagues. I would ask them about their shift, and how they felt they went, and I would ask them for feedback on how they thought I had gone. I learnt a lot from my juniors during that time.



## STROBE Statement—checklist of items that should be included in reports of observational studies

|                              | Item No | Recommendation                                                                                                                                                                                                                                                                                                                                                                                                                                                         | Page No |
|------------------------------|---------|------------------------------------------------------------------------------------------------------------------------------------------------------------------------------------------------------------------------------------------------------------------------------------------------------------------------------------------------------------------------------------------------------------------------------------------------------------------------|---------|
| <b>Title and abstract</b>    | 1       | (a) Indicate the study's design with a commonly used term in the title or the abstract                                                                                                                                                                                                                                                                                                                                                                                 | 1       |
|                              |         | (b) Provide in the abstract an informative and balanced summary of what was done and what was found                                                                                                                                                                                                                                                                                                                                                                    | 1       |
| <b>Introduction</b>          |         |                                                                                                                                                                                                                                                                                                                                                                                                                                                                        |         |
| Background/rationale         | 2       | Explain the scientific background and rationale for the investigation being reported                                                                                                                                                                                                                                                                                                                                                                                   | 2       |
| Objectives                   | 3       | State specific objectives, including any prespecified hypotheses                                                                                                                                                                                                                                                                                                                                                                                                       | 3       |
| <b>Methods</b>               |         |                                                                                                                                                                                                                                                                                                                                                                                                                                                                        |         |
| Study design                 | 4       | Present key elements of study design early in the paper                                                                                                                                                                                                                                                                                                                                                                                                                | 3       |
| Setting                      | 5       | Describe the setting, locations, and relevant dates, including periods of recruitment, exposure, follow-up, and data collection                                                                                                                                                                                                                                                                                                                                        | 3       |
| Participants                 | 6       | (a) <i>Cohort study</i> —Give the eligibility criteria, and the sources and methods of selection of participants. Describe methods of follow-up<br><i>Case-control study</i> —Give the eligibility criteria, and the sources and methods of case ascertainment and control selection. Give the rationale for the choice of cases and controls<br><i>Cross-sectional study</i> —Give the eligibility criteria, and the sources and methods of selection of participants | 3–6     |
|                              |         | (b) <i>Cohort study</i> —For matched studies, give matching criteria and number of exposed and unexposed<br><i>Case-control study</i> —For matched studies, give matching criteria and the number of controls per case                                                                                                                                                                                                                                                 |         |
| Variables                    | 7       | Clearly define all outcomes, exposures, predictors, potential confounders, and effect modifiers. Give diagnostic criteria, if applicable                                                                                                                                                                                                                                                                                                                               | 5       |
| Data sources/<br>measurement | 8*      | For each variable of interest, give sources of data and details of methods of assessment (measurement). Describe comparability of assessment methods if there is more than one group                                                                                                                                                                                                                                                                                   | 5       |
| Bias                         | 9       | Describe any efforts to address potential sources of bias                                                                                                                                                                                                                                                                                                                                                                                                              | 5       |
| Study size                   | 10      | Explain how the study size was arrived at                                                                                                                                                                                                                                                                                                                                                                                                                              |         |
| Quantitative variables       | 11      | Explain how quantitative variables were handled in the analyses. If applicable, describe which groupings were chosen and why                                                                                                                                                                                                                                                                                                                                           | 5       |
| Statistical methods          | 12      | (a) Describe all statistical methods, including those used to control for confounding                                                                                                                                                                                                                                                                                                                                                                                  | 5       |
|                              |         | (b) Describe any methods used to examine subgroups and interactions                                                                                                                                                                                                                                                                                                                                                                                                    | 5       |
|                              |         | (c) Explain how missing data were addressed                                                                                                                                                                                                                                                                                                                                                                                                                            | 5       |
|                              |         | (d) <i>Cohort study</i> —If applicable, explain how loss to follow-up was addressed<br><i>Case-control study</i> —If applicable, explain how matching of cases and controls was addressed<br><i>Cross-sectional study</i> —If applicable, describe analytical methods taking account of sampling strategy                                                                                                                                                              | n/a     |
|                              |         | (e) Describe any sensitivity analyses                                                                                                                                                                                                                                                                                                                                                                                                                                  | 5       |

Continued on next page

| <b>Results</b>           |     |                                                                                                                                                                                                              |     |
|--------------------------|-----|--------------------------------------------------------------------------------------------------------------------------------------------------------------------------------------------------------------|-----|
| Participants             | 13* | (a) Report numbers of individuals at each stage of study—eg numbers potentially eligible, examined for eligibility, confirmed eligible, included in the study, completing follow-up, and analysed            | 6   |
|                          |     | (b) Give reasons for non-participation at each stage                                                                                                                                                         | 6   |
|                          |     | (c) Consider use of a flow diagram                                                                                                                                                                           |     |
| Descriptive data         | 14* | (a) Give characteristics of study participants (eg demographic, clinical, social) and information on exposures and potential confounders                                                                     |     |
|                          |     | (b) Indicate number of participants with missing data for each variable of interest                                                                                                                          |     |
|                          |     | (c) <i>Cohort study</i> —Summarise follow-up time (eg, average and total amount)                                                                                                                             | 6-7 |
| Outcome data             | 15* | <i>Cohort study</i> —Report numbers of outcome events or summary measures over time                                                                                                                          | 7   |
|                          |     | <i>Case-control study</i> —Report numbers in each exposure category, or summary measures of exposure                                                                                                         |     |
|                          |     | <i>Cross-sectional study</i> —Report numbers of outcome events or summary measures                                                                                                                           |     |
| Main results             | 16  | (a) Give unadjusted estimates and, if applicable, confounder-adjusted estimates and their precision (eg, 95% confidence interval). Make clear which confounders were adjusted for and why they were included | 7   |
|                          |     | (b) Report category boundaries when continuous variables were categorized                                                                                                                                    | 7   |
|                          |     | (c) If relevant, consider translating estimates of relative risk into absolute risk for a meaningful time period                                                                                             |     |
| Other analyses           | 17  | Report other analyses done—eg analyses of subgroups and interactions, and sensitivity analyses                                                                                                               | 8   |
| <b>Discussion</b>        |     |                                                                                                                                                                                                              |     |
| Key results              | 18  | Summarise key results with reference to study objectives                                                                                                                                                     | 9   |
| Limitations              | 19  | Discuss limitations of the study, taking into account sources of potential bias or imprecision. Discuss both direction and magnitude of any potential bias                                                   | 11  |
| Interpretation           | 20  | Give a cautious overall interpretation of results considering objectives, limitations, multiplicity of analyses, results from similar studies, and other relevant evidence                                   | 12  |
| Generalisability         | 21  | Discuss the generalisability (external validity) of the study results                                                                                                                                        | 12  |
| <b>Other information</b> |     |                                                                                                                                                                                                              |     |
| Funding                  | 22  | Give the source of funding and the role of the funders for the present study and, if applicable, for the original study on which the present article is based                                                | 12  |

\*Give information separately for cases and controls in case-control studies and, if applicable, for exposed and unexposed groups in cohort and cross-sectional studies.

**Note:** An Explanation and Elaboration article discusses each checklist item and gives methodological background and published examples of transparent reporting. The STROBE checklist is best used in conjunction with this article (freely available on the Web sites of PLoS Medicine at <http://www.plosmedicine.org/>, Annals of Internal Medicine at <http://www.annals.org/>, and Epidemiology at <http://www.epidem.com/>). Information on the STROBE Initiative is available at [www.strobe-statement.org](http://www.strobe-statement.org).
